1 **Title:** Deficits in Behavioral and Neuronal Pattern Separation in Temporal Lobe Epilepsy

2 **Abbreviated Title:** Pattern Separation and Mnemonic Discrimination in Epilepsy

3 **Authors and Affiliations:** A.D. Madar<sup>1,2</sup>, J.A. Pfammatter<sup>1</sup>, J. Bordenave<sup>3</sup>, E.I. Plumley<sup>3</sup>, S.

4 Ravi<sup>1</sup>, M. Cowie<sup>1</sup>, E.P. Wallace<sup>1,3</sup>, B.P. Hermann<sup>3</sup>, R.K. Maganti<sup>3</sup>, M.V. Jones<sup>1</sup>

5 <sup>1</sup>Department of Neuroscience, University of Wisconsin-Madison, 53703

6 <sup>2</sup>Department of Neurobiology, Grossman Institute for Neuroscience, Quantitative Biology and  
7 Human Behavior, University of Chicago, 60637

8 <sup>3</sup>Department of Neurology, University of Wisconsin-Madison, School of Medicine and Public  
9 Health

10 **Acknowledgement:** We thank Lin Lin who helped start behavioral tests in mice in the Jones lab  
11 and Drs. C.E.L Stark and M.A. Yassa for allowing us to use software and materials they  
12 developed.

13 **Author contributions:** Conceptualization: MVJ, ADM. Data curation: ADM, JAP. Formal  
14 analysis: ADM, JAP, MVJ. Funding acquisition: MVJ, ADM, RKM, JAP. Investigation: ADM,  
15 JAP, JB, EIP, SR, MC, EPW. Methodology: ADM, JAP, MVJ. Project administration: JAP,  
16 ADM, MVJ. Resources: MVJ, BPH, RKM. Software: ADM, JAP, MVJ. Supervision: MVJ.  
17 Validation: JAP, ADM. Visualization: ADM, JAP, MVJ. Writing – original draft: ADM. Writing  
18 – review & editing: all authors

19 **Funding:** This work was supported by the US National Institutes of Health (MVJ: RO1  
20 NS075366), the University of Wisconsin Institute for Clinical and Translational Research (MVJ.;  
21 NIH/NCATS UL1TR000427), the US Department of Defense (RKM: PR161864) and Lily's  
22 Fund for Epilepsy Research (ADM.; 2015 fellow).

23 **Conflicts of Interest:** The authors declare no conflict of interest.

24 **Abstract:**

25 In temporal lobe epilepsy, the ability of the dentate gyrus to limit excitatory cortical input to the  
26 hippocampus breaks down, leading to seizures. The dentate gyrus is also thought to help  
27 discriminate between similar memories by performing pattern separation, but whether epilepsy  
28 leads to a breakdown in this neural computation, and thus to mnemonic discrimination  
29 impairments, remains unknown. Here we show that temporal lobe epilepsy is characterized by  
30 behavioral deficits in mnemonic discrimination tasks, in both humans and mice. Using a recently  
31 developed assay in brain slices of the same epileptic mice, we reveal a decreased ability of the  
32 dentate gyrus to perform certain forms of pattern separation. This is due to a subset of granule  
33 cells with abnormal bursting that can develop independently of early EEG abnormalities.  
34 Overall, our results linking physiology, computation and cognition in the same mice, advance  
35 our understanding of episodic memory mechanisms and their dysfunction in epilepsy.

36

37 **Keywords:**

38 Patch-clamp, low-dose systemic kainate model, kainic acid, interictal spikes, novelty  
39 recognition, firing rate, spiking patterns, similarity metrics, input-output, entorhinal cortex,  
40 perforant path, EPSC, excitation/inhibition ratio, dentate gate, Hebb-Marr theory

41

42 **Introduction:**

43 Temporal lobe epilepsy (TLE) represents about 60% of all epilepsy cases, a third of  
44 which are refractory to medication (Tellez-Zenteno and Hernandez-Ronquillo, 2012). TLE is  
45 characterized by recurring focal seizures originating in or near the hippocampus (Toyoda et al.,  
46 2013), microcircuit pathologies in brain regions including the hippocampus (Alexander et al.,  
47 2016) and memory-related cognitive deficits (Helmstaedter et al., 2003; Zhao et al., 2014).  
48 Although the hippocampus is a nexus for episodic memory that is critically affected during TLE,  
49 the relationship between TLE and hippocampus-dependent memory is insufficiently understood.

50 Episodic memory formation is thought to involve storage of neural representations in area  
51 CA3 of the hippocampus via Hebbian plasticity at recurrent excitatory synapses of coactivated  
52 cells (Rolls, 2010). In this view, a partial cue reactivates a subset of the CA3 ensemble that in  
53 turn recruits the other neurons of the original pattern resulting in recall of the original event  
54 (Rolls, 2010). However, recurrent excitation is problematic because it theoretically a)  
55 predisposes the network to over-excitation that could trigger seizures (Le Duigou et al., 2014)  
56 and b) limits the number of patterns that can be stored without overlap (Rolls, 2010).  
57 Overlapping memory representations would in turn lead to interference during recall and thus  
58 cognitive confusion. To solve these problems, it was proposed that the dentate gyrus (DG) of the  
59 hippocampus acts as a) a gate and b) a pattern separator, so that similar cortical representations  
60 are transformed into sparse and dissimilar patterns before reaching CA3 (O'Reilly and  
61 McClelland, 1994; Hsu, 2007; Treves et al., 2008; Dengler and Coulter, 2016).

62 The function of DG as a gate for cortical activity to prevent seizure generation fails in  
63 TLE (Hsu, 2007; Krook-Magnuson et al., 2015; Dengler and Coulter, 2016; Lu et al., 2016):  
64 granule cells (GCs), the output neurons of DG, lose their usual sparseness due to network

65 reorganization (Artinian et al., 2011; Dengler and Coulter, 2016; Dengler et al., 2017) making  
66 cortical excitation easier to propagate to CA3 (Behr et al., 1998; Patrylo et al., 1999; Ouedraogo  
67 et al., 2016). Even in healthy animals, repeated excitation of GCs induces seizures (Krook-  
68 Magnuson et al., 2015) and prolonged stimulation of DG causes TLE (Sloviter, 1983).

69 An alternate view of the DG function, developed in parallel to the concept of dentate  
70 gate, is that it performs pattern separation: the transformation of similar cortical patterns into  
71 dissimilar hippocampal representations. This process theoretically supports mnemonic  
72 discrimination, the ability to distinguish between similar memories. Indeed, DG lesions impair  
73 mnemonic discrimination both in rodents (Treves et al., 2008; Kesner and Rolls, 2015; Kesner et  
74 al., 2016) and humans (Yassa et al., 2011; Baker et al., 2016; Bennett and Stark, 2016; Dillon et  
75 al., 2017). Moreover, computational models (Chavlis and Poirazi, 2017) and recent experiments  
76 (Knierim and Neunuebel, 2016; Berron et al., 2016; Madar et al., 2019a, b) suggest that the DG  
77 circuitry supports multiple forms of pattern separation (Santoro, 2013). Whether such  
78 computations underlie mnemonic discrimination remains unknown.

79 Unsurprisingly, TLE negatively impacts hippocampal-dependent memory in humans  
80 (Coras et al., 2014) and rodents (Groticke et al., 2008; Muller et al., 2009; Inostroza et al., 2013;  
81 Lenck-Santini and Scott, 2015). However, the effect of TLE specifically on DG computations  
82 and DG-dependent cognition remains understudied. It was only recently reported that patients  
83 with TLE are impaired at spatial mnemonic discrimination (Reyes et al., 2018) and that TLE  
84 causes deficits in DG-dependent object location memory in mice (Bui et al., 2018). A  
85 computational model has also suggested that hippocampal pathologies in TLE would degrade  
86 DG pattern separation (Yim et al., 2014) but the hypotheses that 1) TLE causes a breakdown in

87 DG neural pattern separation and 2) that such a failure causes mnemonic discrimination  
88 impairments remain experimentally untested.

89 Here we tested, in humans and mice, whether TLE is characterized by deficits in  
90 mnemonic discrimination and then recorded, in brain slices from the same mice, the spiking  
91 patterns of single GCs in response to parametrically varied afferent stimulation in order to gauge  
92 neuronal pattern separation.

93

#### 94 **Materials and Methods:**

95 *Human Behavior.* A mnemonic similarity task (Stark et al., 2019), also known as a  
96 behavioral pattern separation (BPS) task (Stark et al., 2013), was administered to 15 patients in  
97 the University of Wisconsin-Madison Epilepsy Monitoring Unit. Under an approved Institutional  
98 Review Board protocol and after obtaining informed consent, the task was administered in  
99 conjunction with a standard neuropsychiatric evaluation and during electroencephalographic  
100 (EEG) recording, both of which are part of standard practice for diagnosing the patients' seizures.  
101 Patients were 18-65 years old, male and female. Only patients with a preliminary diagnosis of  
102 TLE were included in our analysis. As controls, 20 subjects without epilepsy, recruited to match  
103 the patients' age and sex distributions (family members of the patients when possible, or other  
104 volunteers), were also tested. Consent documents, medical records and primary data are on file in  
105 a secure location within the Dept. of Neurology. Data were deidentified prior to analysis.  
106 Subjects received no compensation for participation.

107 The visual, object recognition-based BPS task is described in Yassa et al. (2011) and has  
108 been further validated by demonstrating mnemonic discrimination deficits during normal aging  
109 and multiple neurologic and psychiatric disorders (Stark et al., 2019). It was implemented on a

110 laptop by trained neuropsychiatric postdoctoral fellows (J.B. and E.I.P.) using software  
111 distributed freely by the Stark lab (<http://faculty.sites.uci.edu/starklab/mnemonic-similarity-task->  
112 [mst/](#)). Briefly, participants viewed a series of pictures of everyday objects (**Figure 1A**). During  
113 Phase 1, 128 different images were presented and the subject was asked to classify each as  
114 "indoor" or "outdoor", simply to engage the subject's attention. During Phase 2, a new series of  
115 192 images was presented: 1/3 repeated from Phase 1 (*Repeated*), 1/3 new but similar to images  
116 from Phase 1 (*Lure*), and 1/3 new and completely different from Phase 1 (*Novel*). Participants  
117 were asked to classify each image of the Phase 2 set as "Old", "Similar", or "New". BPS was  
118 evaluated with a *discrimination index* computed as the difference between  $p(\text{"Similar"}|\text{Lure})$  and  
119  $p(\text{"Similar"}|\text{Novel})$ , as in past research (Yassa et al., 2011; Stark et al., 2019).

120 ***Mouse Experiments.*** Male mice (C57BL6J, 5-6 weeks old) were received from Envigo  
121 (formerly Harlan, Madison, WI), housed in groups and allowed to acclimate to their new home  
122 environment for one or two weeks. Animals then underwent epilepsy induction with kainic acid  
123 (KA) injections (see below) (J.A.P.). A control group of mice was injected with saline and  
124 another received no injection: both were pooled together and considered as the control group  
125 because our analyses did not reveal any difference. 7-9 weeks after injection, mice started 4  
126 weeks of behavioral testing on the BPS task. After completion of behavioral testing, animals  
127 (~18-20 weeks old) were transferred to a different building for EEG implantation. Each animal  
128 was recorded continuously for three days before being transferred back to the original building  
129 and sacrificed for slice electrophysiology (~20-24 weeks old). After each building-to-building  
130 transfer, mice were allowed a period of acclimation ranging from two days to two weeks.  
131 Behavioral testing (J.A.P, S.R. and M.C.), EEG recordings (E.P.W.) and slice electrophysiology

132 (A.D.M) were performed by different researchers, all of whom were blind to KA or Control  
133 treatments.

134 ***Epilepsy induction.*** During the induction process, when not being handled, mice were  
135 individually housed in enclosed ~150 cm<sup>3</sup> acrylic cubicles with opaque sides and clear front  
136 portals with holes to allow air exchange, food and bedding. Animals were then randomly  
137 assigned to KA or Control treatment, ear punched for identification and weighed. Animals were  
138 induced for epileptogenesis using the repeated low-dose kainate method (Hellier et al., 1998;  
139 Sharma et al., 2018): a series of intraperitoneal injections based on the following schedule.  
140 Animals first received 10 mg/kg of kainic acid (Tocris Bioscience, UK) mixed in 1x PBS (8 ml  
141 per 10 mg) prepared from PBS tablets (Dot Scientific, Michigan) with deionized distilled water  
142 and filter sterilized (Millipore, Burlington, MA). Control animals were injected with an  
143 equivalent volume of saline made of 1x PBS. Animals continued to receive injections at 5mg/kg  
144 every 20 minutes until status epilepticus (SE) occurred (same number of saline injections in  
145 control mice). Some animals received alternating 5mg/kg and 2.5 mg/kg injections after the  
146 initial 10 mg/kg dose, but we found this schedule took more time than 5 mg/kg injections and our  
147 survival rate (>90% across all cohorts) was no different between the two schedules. Animals  
148 were considered to be in SE when displaying persistent behavioral seizures of level 4-5 on the  
149 Racine Scale (Racine, 1972), less than 5 minutes apart, for a minimum of 30 minutes. Animals  
150 received 4-9 injections depending on tolerance to kainic acid and injection schedule. After the  
151 injection schedule, animals were given fresh apple slices, monitored until SE ceased (assessed  
152 from normal posturing, within 1-1.5 hours), and returned to group housing. They were  
153 monitored, weighed and animals weighing less than their preinjection levels were given 0.4 ml of  
154 1x PBS via intraperitoneal injection on a daily basis until their weight exceeded preinjection

155 level. No animal injected with saline ever experienced status epilepticus, lost weight, or required  
156 recovery injections of 1x PBS. Mice remained in the vivarium for 7-9 weeks after injections,  
157 allowing time for the development of epilepsy in KA mice (the latent period in the KA model of  
158 TLE has previously been evaluated as 10-30 days before the first spontaneous electrographic  
159 seizure, and  $\sim 11 \pm 5.4$  weeks before the first spontaneous convulsive seizure (Levesque and Avoli,  
160 2013). During this time some KA mice became aggressive and many of the aggressor animals  
161 were removed from group housing and caged individually.

162 ***Mouse Behavior.*** At 14-16 weeks of age, mice started behavioral testing on a variant of a  
163 novelty recognition-based BPS task that is well established in rodents to report mnemonic  
164 discrimination abilities (van Hagen et al., 2015). Our protocol lasted 4 weeks, including 1 week  
165 of habituation and 3 weeks of trials. During the first week of habituation, each mouse was gently  
166 handled by the experimenter for five minutes every day. On the second week mice were split into  
167 three groups (A, B, and C). Each group went through a three-day schedule where animals were  
168 habituated on the first and second days and performed the object location task on the third day.  
169 Groups were staggered by one day each, such that group A was scheduled Monday-Wednesday,  
170 B Tuesday-Thursday and C Wednesday-Friday. Animals were housed following a 12:12 light-  
171 dark cycle and always handled or tested between 1 pm and 4pm (light period).

172 The arena used for the BPS task (see **Figure 3A**) was a 63.5 x 63.5 x 15 cm open topped  
173 Plexiglas box wrapped on the outside and bottom with black felt cloth. On each side of the arena  
174 were different images serving as proximal cues for orientation. The room also had numerous  
175 distinct distal cues (e.g. the video camera placed over the center of the arena, shelving, etc.), that  
176 were kept unchanged. During behavioral testing, the room was lit with a single bank of overhead  
177 fluorescent lamps.



178 For the BPS task, animals underwent three phases of exploration in the arena, each  
179 lasting 3 min and separated by 1.5 min of single housing in a solitary chamber. In Phase 1  
180 (habituation) the arena was empty, in Phase 2 (sampling) the arena contained two identical  
181 objects in the center, and in Phase 3 (testing) one object had been randomly selected and  
182 displaced by a distance of 7, 14 or 21 cm. The arena and objects were cleaned with 70% ethanol  
183 before and after each phase. During Phases 2 and 3, the experimenter recorded the amount of  
184 time that the mouse spent interacting with each object with two silent stopwatches. The mouse  
185 was considered to be interacting with an object if it was within 1 cm of it and oriented towards,  
186 sniffing, scratching, or on top of the object. These three phases were repeated three times with a  
187 different distance each week, with the order of distances randomized. Objects used for the task  
188 were ~6 cm tall block style plastic colored figures or metal cylinders, with a footprint of ~2 cm  
189 in diameter.

190 All phases of the experiment were recorded with a 1080p webcam positioned above the  
191 arena. During all phases, the experimenter sat in the corner of the room out of the line of sight of  
192 the mouse. The experimenter was consistent in appearance and smell (e.g., same experimenter  
193 for a given cohort, wearing same white lab coat and gloves of the same color each day; use of  
194 scented soap, etc. was minimized).

195 ***BPS Analysis.*** The discrimination ratio for each trial was computed as  $(T_{\text{moved}} - T_{\text{unmoved}})$   
196 /  $T_{\text{total}}$  where  $T_{\text{moved}}$  is the time spent exploring the moved object,  $T_{\text{unmoved}}$  is the time spent  
197 exploring the unmoved object and  $T_{\text{total}}$  is the sum of  $T_{\text{moved}}$  and  $T_{\text{unmoved}}$ . The exploration times  
198 used to calculate the reported discrimination ratio were manually collected by experimenters  
199 during the BPS task. We (M.V.J. and J.A.P.) also developed a home-written program using video  
200 recordings for motion-tracking and trajectory analysis of each mouse during behavioral testing.

201 Discrimination ratios computed from automated tracking data were well correlated to the ratios  
202 from manually recorded times, and led to similar results ( $R^2 = 0.68$ ,  $T(117) = 16.07$ ,  $P < 0.001$ ).  
203 Automated tracking data were also used to assess a) distance traveled as an estimate of motility  
204 and exploration and b) tendency to stay close to walls (i.e., thigmotaxis) as an estimate of  
205 anxiety. Thigmotaxis (Simon et al., 1994) was evaluated as the proportion of time spent within  
206 6.35 mm of the wall (10% of the arena width).

207 ***Mouse electroencephalography (EEG).*** EEG electrode implantation was performed at  
208 ~18-20 weeks of age for all animals, following a previously established protocol (Wallace et al.,  
209 2015). Briefly, mice were anesthetized with isoflurane and stainless steel screw electrodes were  
210 implanted in the skull (bregma +1.5 mm and 1 mm right, bregma -3 mm and 1 mm left, and  
211 lamda -1 mm at midline). Two stainless steel braided wires were placed in the nuchal muscles  
212 for electromyography (EMG) recording. After a 72 hour recovery, we transferred mice into  
213 individual tethered EEG acquisition chambers and allowed a >12 hour acclimation period. We  
214 acquired EEG and EMG signals continuously for 3 days. Recordings were digitized with an  
215 XLTek amplifier (XLTEK, USA) sampled at 1024 Hz. Ad libitum access to food and water was  
216 ensured.

217 ***Interictal spike (IIS) analysis.*** In humans and most animal models of acquired TLE,  
218 overt seizures are relatively rare (often much less than once per day) (Levesque et al., 2016). In  
219 contrast, nonconvulsive and subclinical epileptiform events such as interictal spikes (IISs) can be  
220 very frequent, as much as many hundreds per day. Therefore, in order to assess epileptiform  
221 activity in KA animals, we used a modification of our previously published principal  
222 components (PC)-based method to quantify IISs (Pfammatter et al., 2018) and calculated an  
223 "Hourly IIS index" for each animal. All detected high-amplitude EEG events from 9 Ctrl and 15

224 KA animals were projected into the space spanned by their first three PCs. The main  
225 modification here is that, instead of using a Gaussian Mixture Model (GMM) to assign events to  
226 'clusters', we simply gridded the PC space into 'voxels' and computed relevant quantities within  
227 each voxel exactly as we computed those same quantities within GMM 'clusters' previously: 1)  
228 The probability that events within a voxel are characteristic of an epileptogenic treatment (i.e.,  
229 KA) was computed as the voxel-wise proportion of events coming from KA mice, 2) Only the  
230 voxels above chance level were considered specific to epileptogenic treatment and probabilities  
231 were scaled accordingly, 3) The Hourly IIS Index of a given animal was defined as the average  
232 frequency of detected events weighted by the scaled probabilities of each event's voxel. This new  
233 voxel-based method has the advantages to make no assumptions about the structure of the data in  
234 PC space or about the number of clusters to fit. Instead, the main free parameter is now the voxel  
235 volume: we selected a size of 10 cubic PC units following the same optimization procedure  
236 described in Pfammatter et al. (2018) in order to avoid overfitting. Extensive exploration (not  
237 shown) revealed that the final results are similar to the GMM method and are not importantly  
238 affected by moderate changes in voxel volume.

239 ***Slice electrophysiology.*** Mice used for electrophysiology were p115-p182 at the time of  
240 experiment (mean  $\pm$  SEM: p141  $\pm$  4 days; no difference in age between treatments: KA n = 13,  
241 Ctrl n = 6, U-test: P = 0.9, Z = 0.2, rank sum = 246). Age was also not correlated with any  
242 summary statistics presented in this study.

243 Adult mice were euthanized by transcardial perfusion with oxygenated PBS under  
244 isoflurane anesthesia, before decapitation and brain extraction. 400  $\mu$ m horizontal slices of the  
245 ventral and intermediate hippocampus were prepared as detailed in Madar et al. (2019a). After  
246 slicing in a sucrose-based cutting solution (Yi et al., 2015), slices were transferred to an

247 incubation chamber filled with 50% cutting solution and 50% artificial cerebrospinal fluid  
248 (aCSF) at 37°C for 30 minutes, then room temperature. Patch-clamp recordings were done in a  
249 chamber submerged with aCSF containing (in mM) 125 NaCl, 25 NaHCO<sub>3</sub>, 2.5 KCl, 1.25  
250 NaH<sub>2</sub>PO<sub>4</sub>, 2 CaCl<sub>2</sub>, 1 MgCl<sub>2</sub>, and 25 D-Glucose, flowing at 5 ml/min and saturated with a gas  
251 mixture of 95% O<sub>2</sub> and 5% CO<sub>2</sub>. Stimulation was applied through a double-barreled "theta"  
252 pipette filled with aCSF. Patch pipettes were filled with an intracellular solution of the following  
253 composition (in mM): 135 K-gluconate, 5 KCl, 0.1 EGTA, 10 HEPES, 20 Na-Phosphocreatine,  
254 2 Mg<sub>2</sub>-ATP, 0.3 Na-GTP, 0.25 CaCl<sub>2</sub> adjusted to pH 7.3 with KOH and 310 mOsm with H<sub>2</sub>O,  
255 leading to a 2-5 MΩ pipette resistance in aCSF. Whole-cell patch-clamp recordings of single DG  
256 GCs in response to electric stimulation of the outer molecular layer (perforant path) were  
257 performed as detailed in Madar et al. (2019a) (see **Figure 4A**), and the stimulation protocols  
258 used to test neural pattern separation were the same as in Madar et al.(2019b) (see **Figure 4B** and  
259 **5**). Briefly, input sets used for stimulation were composed of five (type 1) or ten (type 2 and 3)  
260 spiketrains (two seconds long), delivered sequentially (separated by five seconds of pause) and  
261 repeated ten or five times, respectively, in order to yield fifty output spiketrains. The stimulation  
262 pipette was placed >100μm lateral to the recorded GC to avoid direct stimulation of GC  
263 dendrites, with the baseline membrane potential held at -70 mV for current and voltage-clamp  
264 recordings (see **Figure 4A-B, 7B**).

265         Intrinsic electrophysiological properties of recorded GCs were the following (mean ±  
266 SEM for Ctrl / KA): resting membrane potential  $V_{rest} = -78.0 \pm 1.9 / -81.4 \pm 1.2$  mV; membrane  
267 resistance  $R_m = 139 \pm 17 / 178 \pm 16$  MΩ; membrane capacitance  $C_m = 18 \pm 1.2 / 17 \pm 0.7$  pF.  
268 There were no significant differences between control and KA mice (U-tests: P = 0.1, 0.2, 0.7; Z  
269 = 1.6, -1.2, 0.4; rank sums = 294, 198.5, 252.5 respectively).

270            *Neural pattern separation analysis.* Similarity between spiketrains was assessed as in  
271 Madar et al. (2019a, b), using three metrics based on dividing spiketrains into time bins of a  
272 specific duration  $\tau_w$ : the Pearson's correlation coefficient (R), the normalized dot product (NDP)  
273 and the scaling factor (SF). NDP and SF consider spiketrains as vectors of spike count per bin  
274 and measure the angle (NDP is the cosine) and the ratio of norms (SF) between the two vectors.  
275 R considers vectors of deviation from mean spike count, which loses the original angle between  
276 the vectors of raw spike counts and leads to considering common periods of silence as correlated,  
277 unlike NDP. Both R and NDP are sensitive to binwise synchrony, whereas SF is more sensitive  
278 to differences in firing rate and burstiness (see Madar et al. 2019b for a detailed discussion on the  
279 different neural codes assumed by each metric). To further test the role of various spiketrain  
280 features in mediating pattern separation, we also considered neural codes purely focused on  
281 either 1) the average firing rate (FR), 2) the compactness (1 - proportion of time bins with at least  
282 one spike) and 3) the occupancy (average number of spikes in bins with at least one spike).  
283 These were computed as in Madar et al. (2019b) and the degree of pattern separation (or  
284 convergence, for negative values) was evaluated as the difference between the dispersion of the  
285 output spiketrains minus the dispersion of the input spiketrains. The dispersion was computed as  
286 the mean absolute value of pairwise differences for each spiketrain feature (FR, Compactness or  
287 Occupancy) over all spiketrains of a set, excluding self-comparisons and, in the case of the  
288 output sets, all comparisons between output spiketrains resulting from the same input spiketrain.  
289 When using a similarity metric S (R, NDP or SF), pattern separation was assessed following the  
290 same logic. First, the similarity between each pair of spiketrains of a given set was computed.  
291  $S_{\text{input}}$  was the average for all pairs of an input set (excluding self-comparisons), and  $S_{\text{output}}$  was  
292 the average of all pairs in output sets excluding comparisons between output spiketrains coming

293 from repetitions of the same input train. This yielded a single output similarity value for a given  
294 output set, and the degree of pattern separation was thus  $S_{\text{input}} - S_{\text{output}}$ . To gain a finer view, we  
295 also performed a pairwise analysis (as in Madar et al. 2019b) where each of the pairwise  $S_{\text{input}}$  of  
296 an input set were distinguished (10 pairs for input sets of type 1, 45 pairs for input sets of type 2  
297 and 3). The pairwise  $S_{\text{output}}$  (pw  $S_{\text{output}}$ ) was thus the average similarity across all pairs of output  
298 spiketrains resulting from a given pair of input spiketrains. Pattern separation was computed as  
299  $\text{pw } S_{\text{input}} - \text{pw } S_{\text{output}}$ .

300 *Software and statistics.* Data analysis was performed using MATLAB (Mathworks,  
301 Natick, MA, USA). The Lilliefors test was used to verify the normality of data distributions  
302 (Lilliefors, 1967). Parametric or nonparametric statistical tests were appropriately used to assess  
303 significance (p-value < 0.05). Throughout the Results section, KW ANOVA corresponds to the  
304 nonparametric Kruskal-Wallis analysis of variance, U-test corresponds to the Wilcoxon rank-  
305 sum test equivalent to the Mann-Whitney U-test, and KS test corresponds to the two-sample  
306 Kolmogorov-Smirnov test (sidedness is specified in the legends).

307 To analyze performance of mice on the BPS task (**Figure 3B**) we performed a two-way  
308 ANOVA with the Matlab function *anova* based on a linear mixed-effects model built using  
309 *fitlme*, with the distance of the moved object as a continuous fixed effect, animal treatment (Ctrl  
310 vs. KA) as a categorical fixed effect, and animal identity nested within object distances as a  
311 random effect to account for repeated measurements. The same procedure was used for each  
312 panel in **Figure 3D-E**.

313 To determine whether ( $S_{\text{input}}, S_{\text{output}}$ ) distributions were significantly different (**Figures 4-**  
314 **5**), we performed an analysis of the covariance (ANCOVA) using separate parabolic or linear

315 regression models, implemented in MATLAB with a custom-written code following the method  
316 described in (Motulsky and Ransnas, 1987), as in Madar et al. (2019a, b)

317 In **Figure 8A**, the non-linear regression was performed using the Matlab function *fitnlm*  
318 with a three-parameter model function  $f(x) = a/(x + b) + c$

319

## 320 **Results:**

321 ***Behavioral pattern separation deficits in TLE.*** Mnemonic discrimination is often called  
322 behavioral pattern separation (BPS) because it is hypothesized to be the behavioral outcome of  
323 neural pattern separation. It is the ability to discriminate between similar experiences (event,  
324 environment, object, etc.) that occurred at different times (Santoro, 2013). Multiple BPS tasks  
325 have been demonstrated to be DG-dependent in humans (Baker et al., 2016) and rodents (Kesner  
326 and Rolls, 2015; Kesner et al., 2016; Bui et al., 2018). We thus chose some of these established  
327 tasks to test whether TLE impacts DG-dependent cognition, both in humans and mice.

328 In humans, we used the object recognition-based *Mnemonic Similarity Task* developed by  
329 the Stark lab (Stark et al., 2019), where participants must distinguish between similar images  
330 presented at different times (**Figure 1A, Materials and Methods – Human behavior**). Patients  
331 previously diagnosed with TLE showed a severe deficit (~50%) compared to nonepileptic  
332 subjects in their ability to correctly identify objects as being similar but not identical (**Figure 1**).  
333 These results confirmed our hypothesis that TLE impairs DG-dependent mnemonic  
334 discrimination, thus warranting further study of the impact of TLE on DG computations that  
335 might explain this cognitive deficit.

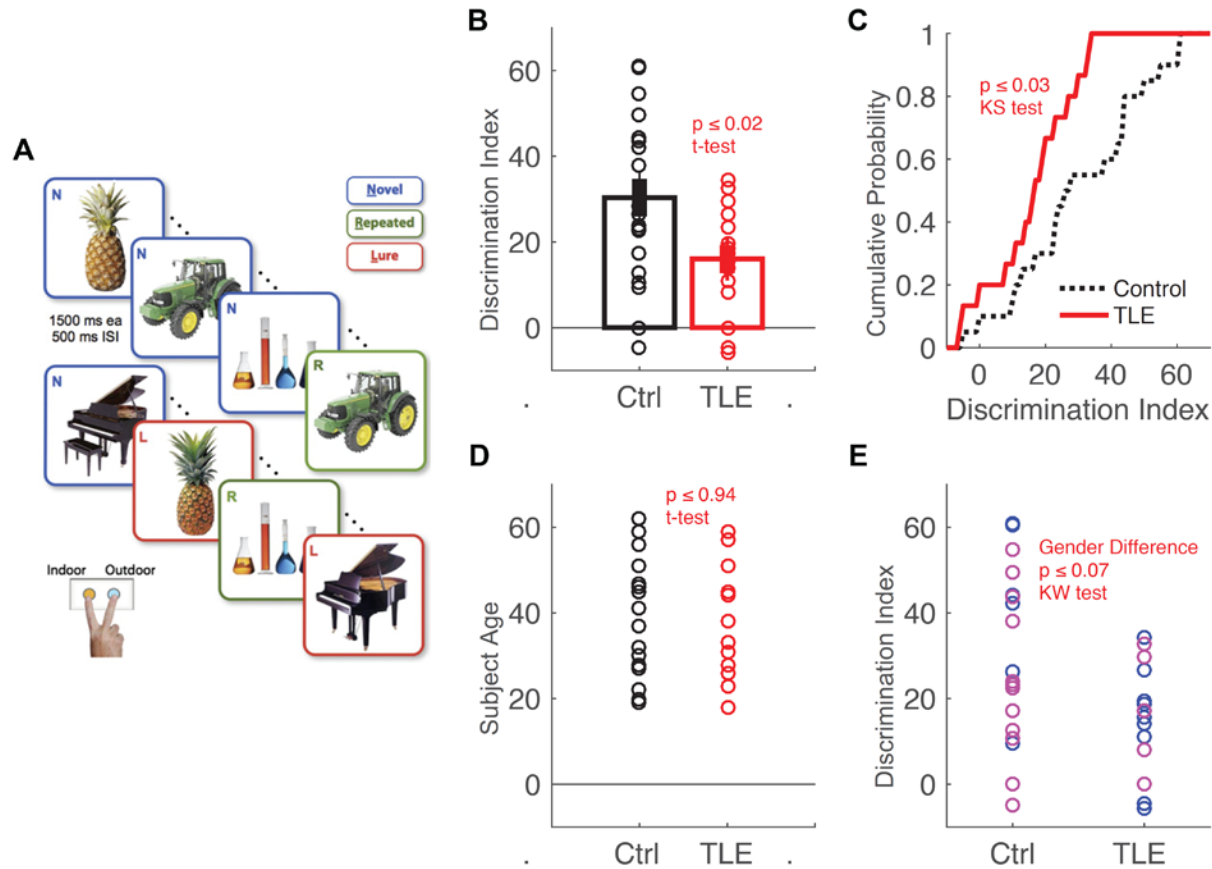

336

337 **Figure 1. Human patients with TLE have mnemonic discrimination deficits**

338 (A) A schematic (adapted with permission from Yassa et al., 2011) of the mnemonic  
 339 discrimination task given to patients with TLE and nonepileptic control subjects. The  
 340 discrimination index measures the ability of participants to correctly identify images as similar  
 341 but not identical to a previously seen image.

342 (B) Human patients with temporal lobe epilepsy (red,  $n = 15$ ) display a significant deficit in this  
 343 object recognition-based mnemonic discrimination task compared to nonepileptic control  
 344 subjects (black,  $n = 20$ ). Unpaired two-sided T-test:  $P = 0.0183$ ,  $T(33) = 2.4832$ .

345 (C) The same data from B, presented as cumulative frequency distributions. A non-parametric  
 346 one-way KW ANOVA on the indices grouped by treatment confirms a highly significant deficit  
 347 in visual pattern separation memory for human subjects with TLE ( $P = 0.0343$ ,  $\chi^2(34) = 4.4809$ ).

348 (D) TLE and Ctrl groups were properly age matched (unpaired two-sided T-test:  $P = 0.9411$ ,  
 349  $T(31) = -0.0745$ ).

350 (E) There were slightly more women than men in the control group, but the gender difference  
 351 was not significant between the two treatments (one-way KW ANOVA on gender values, 1 or 2,  
 352 grouped by treatment:  $P = 0.0663$ ,  $\chi^2(32) = 3.3724$ ).

353



354 To investigate the effect of TLE at the behavioral, computational and cellular levels, we  
355 turned to the common post-kainate animal model of acquired TLE (KA, **Methods – Mouse**  
356 **experiments**). An automated detection algorithm of interictal spikes (IISs) allowed us to  
357 quantify epileptiform activity in each animal even in the absence of seizures (**Methods –**  
358 **Automated EEG analysis** and see Pfammatter et al. 2018). Most KA animals developed IISs  
359 (**Figure 2**).

360

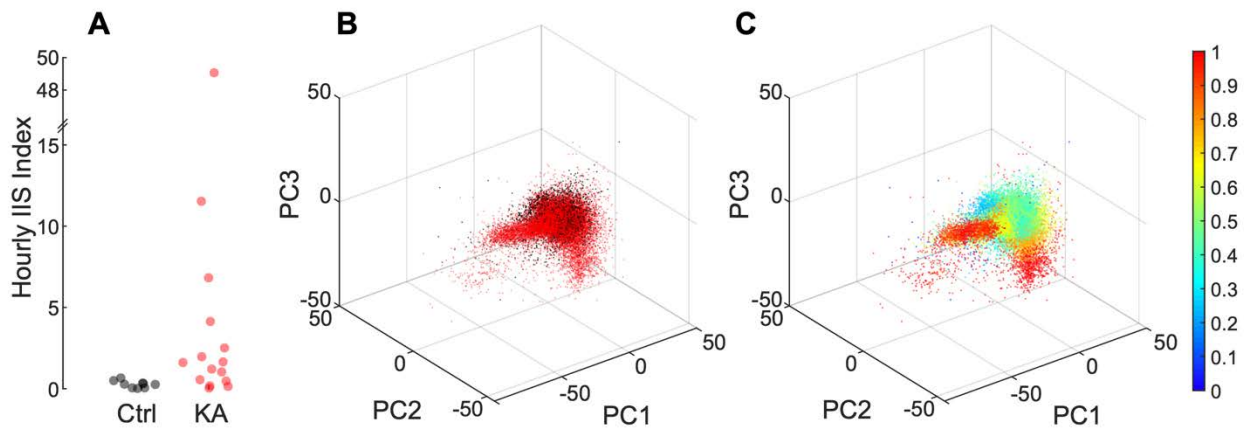

361 **Figure 2. Kainate-injected mice have epileptiform electrographic events with a range of**  
362 **event frequency**

364 (A) The Hourly Interictal Spikes (IIS) index, a proxy for epilepsy severity based on EEG  
365 recordings (Pfammatter et al., 2018), was calculated for 9 Ctrl (black) and 15 KA (red) animals.  
366 KA animals have a significantly higher Hourly IIS index than Ctrl animals (U-test:  $P = 0.009$ ,  $Z$   
367  $= 2.207$ , rank sum = 225).

368 (B) To compute the index, high-amplitude events (200 ms duration) were identified from left  
369 frontal EEG and projected on the first three principal components (PC) of the ensemble of events  
370 from all mice. Each dot here is an EEG event, red when from a KA animal and black when from  
371 a Ctrl. Notice the 'fingers' of red KA dots extending from the central cluster of mixed Ctrl and  
372 KA data points.

373 (C) Using a voxel gridding of the PC space (voxel size: 10 cubic units), we calculated the  
374 probability for each event to be specific to KA treatment (see scale bar). The hourly IIS index of  
375 a mouse is the average number of detected events/hour, weighted by their probability of being  
376 specific to the KA treatment.

377

378

379           Prior to EEG recordings, mice were subjected to an object-location novelty-recognition  
380 BPS task (**Methods – Mouse Behavior**) where their ability to discriminate between a moved  
381 object versus an identical unmoved object was measured for different object displacement  
382 distances (**Figure 3A**). Our results demonstrate that, on average, KA mice have lower object-  
383 location mnemonic discrimination than control mice at all object distances (**Figure 3B-C**).  
384 Control analyses of motility (assessed by the total distance moved) and anxiety levels (assessed  
385 by the time spent near walls) revealed that KA mice have no obvious locomotor deficits nor do  
386 they spend more time near walls during the testing phases (**Figure 3D-E**). Moreover, there was  
387 no correlation between individual mnemonic discrimination ratios and total distance moved ( $R^2$   
388 = 0.028,  $T(118) = 1.86$ ,  $P = 0.066$ ) or time spent near walls ( $R^2 = 0.002$ ,  $T(118) = 0.50$ ,  $P = 0.62$ )  
389 during phase 3. These results suggest that differences between KA and control mice in the BPS  
390 task were not due to differences in motor ability, exploration or anxiety.

391           TLE is thus accompanied by mnemonic discrimination deficits in both humans and mice.

392

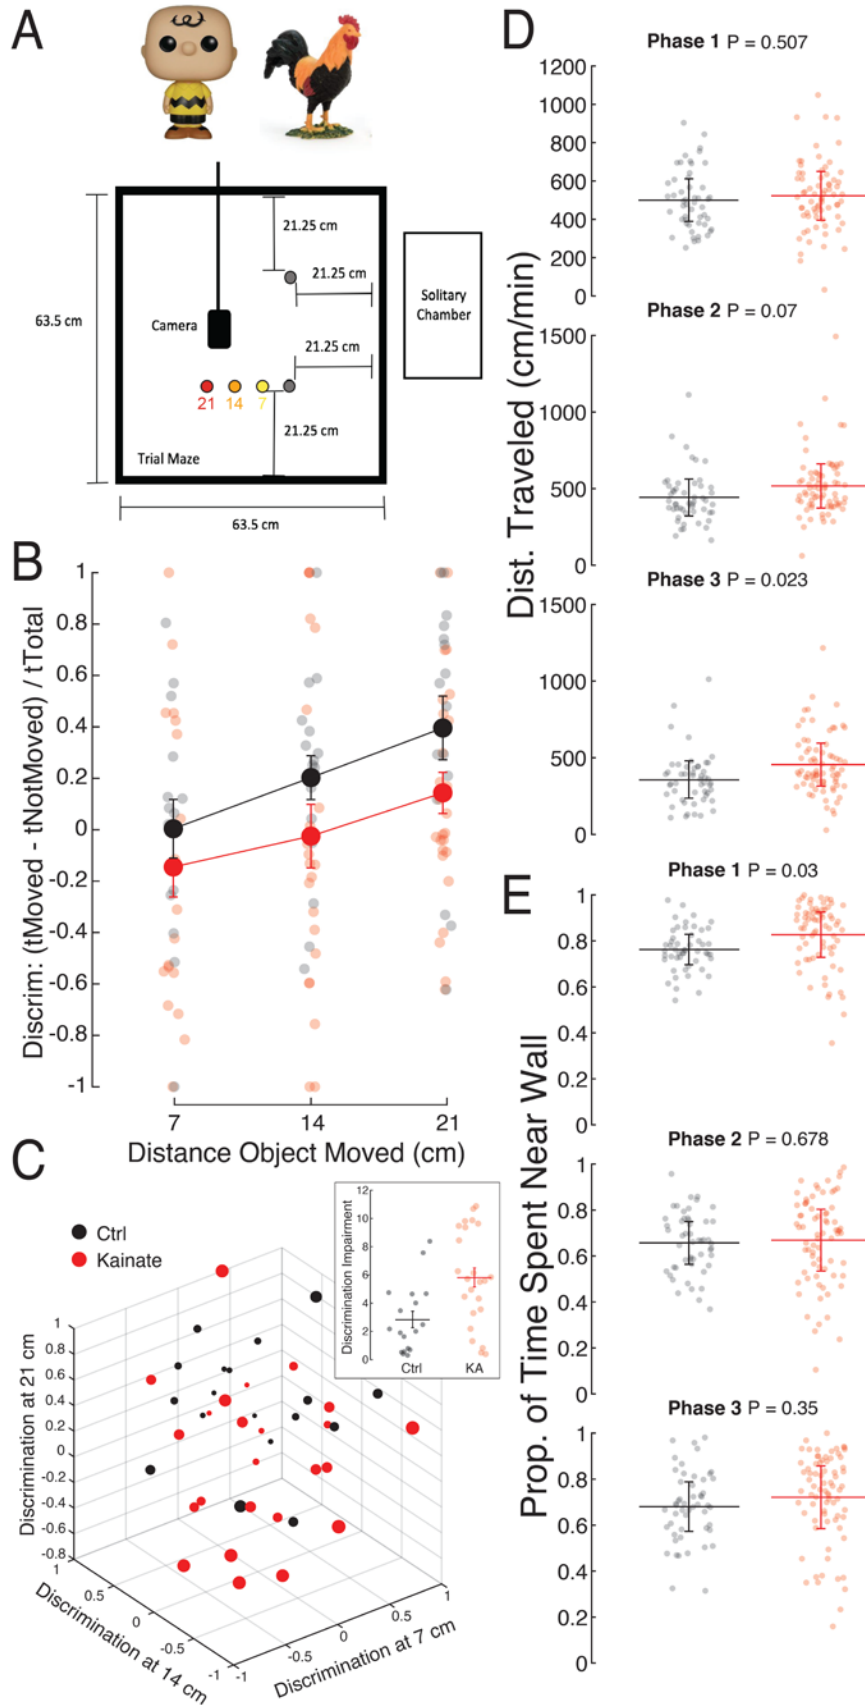

394 **Figure 3. Kainate-injected mice have deficits in mnemonic discrimination**

395 (A) Object location BPS task arena setup. The experiment was run in three phases of three  
396 minutes. In Phase 1, a mouse was allowed to explore the empty square arena. In Phase 2, the  
397 same mouse was allowed to explore the same arena but with two identical objects (position  
398 indicated by grey circles). In Phase 3, one randomly chosen object was moved either 7, 14 or 21  
399 cm from its original position and the mouse was allowed to explore again. Between phases, the  
400 mouse was placed in a solitary chamber for 1.5 minutes. Each mouse performed the task once at  
401 each distance with different objects, in randomized order, with a week in between trials.

402 (B) Performance at the BPS task is evaluated with a discrimination ratio computed for each  
403 animal at each distance. Healthy mice generally prefer to explore objects with novel  
404 characteristics (such as change in relative position) and are thus expected to spend more time  
405 with the moved object if they notice it has changed location. Discrimination is thus quantified as  
406 the difference between the time exploring the moved object and the time exploring the unmoved  
407 object. A two-way ANOVA with repeated measures shows that mice discriminate better when  
408 objects are moved farther apart, and that Ctrl mice ( $n = 29$ ) discriminate better than KA mice ( $n$   
409  $= 27$ ) (Distance Object Moved:  $P = 0.002$ ,  $F(1,118) = 9.84$ ; Treatment:  $P = 0.027$ ,  $F(1,118) =$   
410  $5.02$ ).

411 (C) Subset of the data in B plotted in the space of discrimination at each distance, allowing a  
412 clearer picture of individual performance. Each animal is represented by a single dot in this 3D  
413 space (42 animals with records at the three distances: 24 KA and 18 Ctrl). For each data point,  
414 the Mahalanobis distance (De Maesschalck et al., 2000) from the Ctrl centroid is represented by  
415 the dot size, and is also displayed in the inset (mean  $\pm$  SEM). Mahalanobis distances are larger  
416 for KA than Ctrl animals, confirming that the KA population displays mnemonic discrimination  
417 deficits (two-sided T-test:  $P = 0.003$ ,  $T(40) = -3.15$ ).

418 (D,E) Control analysis to determine whether there were motor impairments or anxiety/curiosity  
419 differences between KA and Ctrl mice, across phase 1, 2 and 3 of the BPS task. In each panel,  
420 individual mice are represented by one to three data points, as in B, depending on how many  
421 conditions (Distance Object Moved) they were tested on. Mean  $\pm$  SEM.

422 (D) Distance traveled was used as a proxy for motor ability. During Phase 1 and Phase 2, control  
423 and KA mice moved similar distances ( $P = 0.507$ ,  $F(1, 120) = 0.443$  and  $P = 0.070$ ,  $F(1, 122) =$   
424  $3.35$ ). During Phase 3 KA mice moved farther than Ctrl mice ( $P = 0.023$ ,  $F(1, 124) = 5.34$ ).

425 (E) Percent of time near wall was used as a proxy for anxiety. During Phase 1 (habituation), KA  
426 animals spent more time near the maze walls compared to Ctrl ( $P = 0.03$   $F(1,120) = 4.82$ ).  
427 During Phases 2 and 3, Ctrl and KA animals spent a similar amount of time near walls ( $P = 0.68$ ,  
428  $F(1,122) = 0.173$  and  $P = 0.35$ ,  $F(1, 124) = 0.881$ ). F-tests correspond to one-way ANOVAs with  
429 repeated measures, with Treatment as a categorical fixed effect.

430

431 *DG computational impairments in TLE.* To test our hypothesis that DG pathologies in

432 TLE lead to a breakdown of the neural pattern separation function of the DG, which in turn

433 would translate into the cognitive impairments we observed, we measured pattern separation in

434 hippocampal slices from the same KA and control mice used above in behavioral and EEG

435 experiments. Briefly, the assay has three steps (**Figure 4A-B** and see Madar et al. 2019a, b): 1)  
436 ensembles of stimulus patterns (simulating afferent input spiketrains) are generated, with known  
437 degrees of similarity to each other. These spiketrains are then fed into the DG by stimulating the  
438 lateral perforant path. 2) The response of a single GC is recorded in whole-cell current-clamp. 3)  
439 The similarity between the output spiketrains is compared to the similarity between the input  
440 spiketrains, revealing the degree of separation or convergence (**Figure 4C** and see **Material and**  
441 **Methods – Neural pattern separation analysis**).

442 We tested pattern separation levels in response to three types of input sets. Input sets of  
443 type 1 were constituted of Poisson spiketrains with a 10 Hz mean firing rate designed to have a  
444 prespecified average similarity as measured by the Pearson's correlation coefficient ( $R$ ) (**Figure**  
445 **4B**). For an input set with spiketrains correlated by 77% between each other (timescale:  $\tau_w = 20$   
446 ms), the output spiketrains of GCs from epileptic mice had a higher average correlation ( $R_{\text{output}}$ )  
447 than GCs from control mice (**Figure 4C**). This demonstrates a decrease in pattern separation in  
448 the DG of epileptic mice. Exploring a wider range of input correlations shows that the pattern  
449 separation function of the DG of KA mice is generally impaired compared to the normal pattern  
450 separation function (**Figure 4D**). Furthermore, a decrease in pattern separation was observed at  
451 multiple timescales (millisecond to second) and using multiple similarity metrics that assume  
452 different neural codes (**Figure 4E**, see **Material and Methods – Neural pattern separation**  
453 **analysis**). The impairment is most noticeable using the NDP metric, showing that DG output  
454 patterns are less orthogonalized in KA animals at all timescales, whereas differences in pattern  
455 separation via scaling (SF metric) are small but significant at large timescales.

456

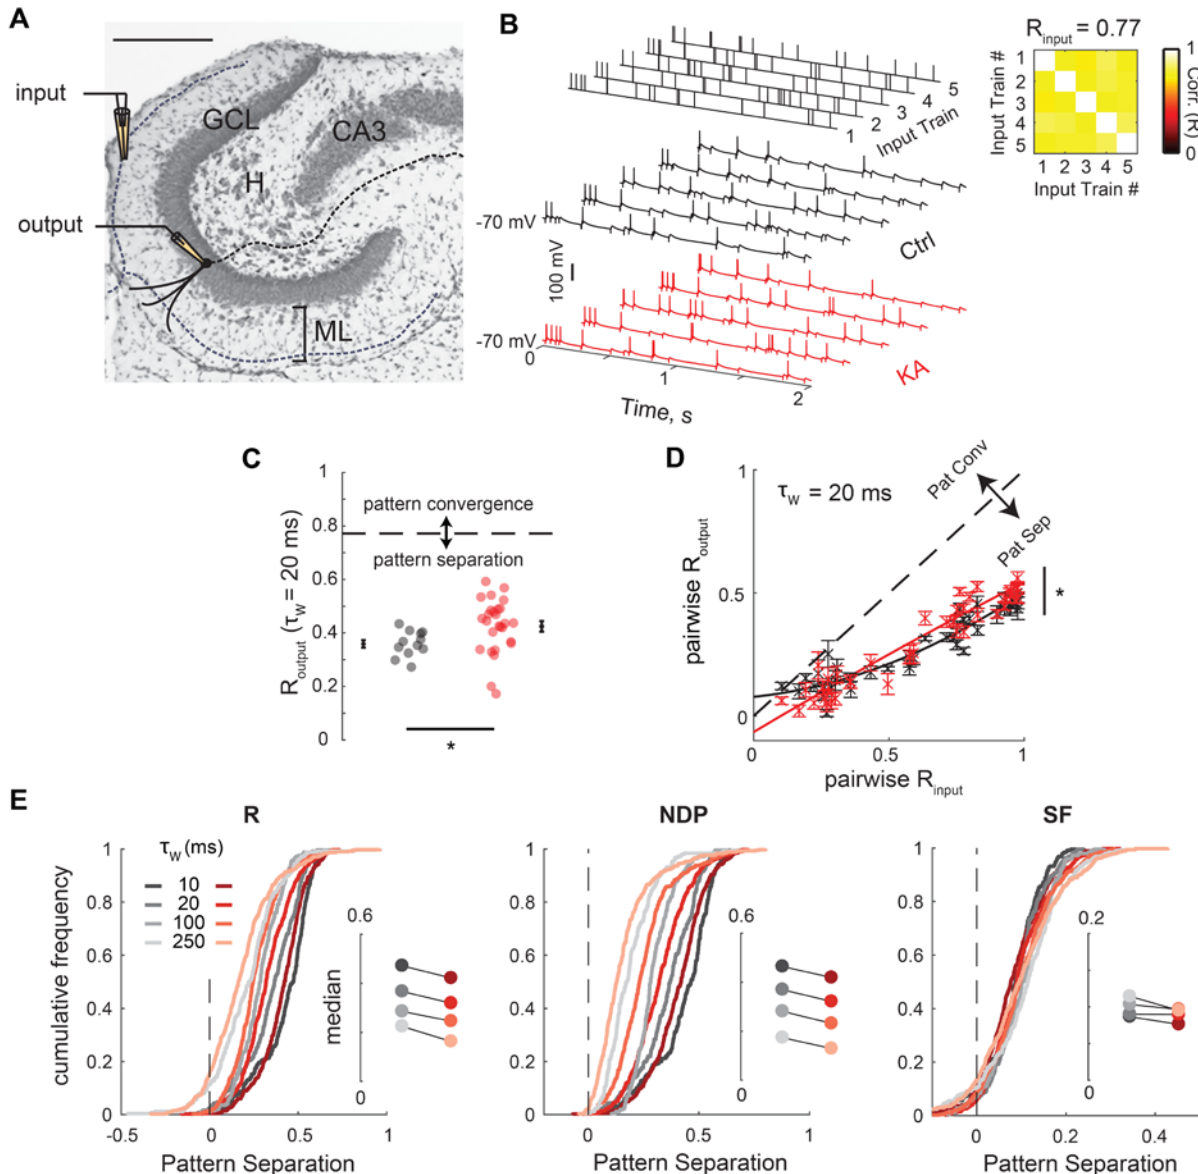

457  
458 **Figure 4. Epileptic mice have neural pattern separation deficits**

459 (A) Histology of the DG in a horizontal slice (Cresyl violet/Nissl staining; scale bar: 250  $\mu\text{m}$ ),  
460 overlaid with a schematic of the experimental setup: a theta pipette in the ML is used to focally  
461 stimulate the outer molecular layer (input) while a responding GC is recorded via whole-cell  
462 patch-clamp (output). GCL: granule cell layer, H: hilus, ML: molecular layer. Solid lines  
463 represent dendrites and dashed lines axons.

464 (B) Current-clamp recordings of the membrane potential of two different GCs (Ctrl and KA) in  
465 response to the same set of input trains. An input set is constituted of five different trains of  
466 electrical pulses following a Poisson distribution with an average rate of 10 Hz. The Pearson's  
467 correlation coefficient ( $R$ ) between two input trains is computed with a binning window ( $\tau_w$ ) of  
468 20 ms (Left).  $R_{\text{input}}$  is the average of the ten pairwise coefficients, diagonal excluded. After  
469 converting the GC recordings to vectors of binned spike counts, the pairwise coefficients and  
470 their average ( $R_{\text{output}}$ ) can be computed the same way (Madar et al, 2019b). Note that the input set  
471 was repeated 10 times to yield output sets of fifty sweeps (only one repeat is shown).

472 (C) The  $R_{\text{output}}$  of GCs from kainate-injected animals is higher, on average, than in GCs from  
473 controls. Data points correspond to single output sets (KA: 27 recordings from 24 GCs; Ctrl: 12  
474 recordings from 11 GCs), all being responses to the same input set as in B. Black crosses with  
475 error bars are means  $\pm$  SEM. The asterisk signals significance: U-test comparing the medians:  $P$   
476 = 0.011,  $Z = -2.541$ , rank sum = 156; two-sided two-sample KS test comparing the distribution  
477 shapes:  $P = 0.0037$ ,  $D = 0.583$ . The dashed line corresponds to  $R_{\text{input}}$  (0.77): any value below the  
478 line implies effective pattern separation. Thus, GCs from kainate animals exhibit less pattern  
479 separation than controls.

480 (D) Pattern separation was investigated over a wide range of input correlations by using four  
481 different input sets of five 10 Hz Poisson trains (at  $\tau_w = 20$  ms:  $R_{\text{input}} = 0.24, 0.45, 0.77, 0.95$ ).  
482 Crosses and error bars correspond to mean  $\pm$  SEM (pw  $R_{\text{input}}$ , pw  $R_{\text{output}}$ ) across multiple  
483 recordings (KA: 6-24 GCs per input set; Ctrl: 4-11 GCs). Data points below the identity line  
484 (dashed) correspond to pattern separation. The distributions between KA and Ctrl are  
485 significantly different (ANCOVA with separate parabolic models fitting the data points and not  
486 the means:  $P < 0.0001$ ,  $F(3,714) = 15.485$ ). Solid curves are the parabolic models used for the  
487 ANCOVA.

488 (E) Levels of pattern separation measured using different similarity metrics (S: R, NDP and SF,  
489 see Methods) and timescales. Cumulative frequency distributions of the distance of (pw  $S_{\text{input}}$ ,  
490 pw  $S_{\text{output}}$ ) data points to the identity line in pattern separation graphs like in E. Positive values of  
491 the x-axis correspond to pattern separation, and negative values to pattern convergence. Insets  
492 show medians. For R and NDP, distributions are significantly shifted to the left, showing that  
493 GCs from KA exhibit less decorrelation and less orthogonalization (ANCOVA as in D, but using  
494 separate linear models:  $P < 0.01$  for  $\tau_w = 5$  to 1000 ms. For R/NDP and  $\tau_w = 10, 20, 100, 250$  ms,  
495  $P = <0.0001/<0.0001, <0.0001/<0.0001, 0.001/<0.0001, 0.011/0.0001, F(2, 716) = 15.2/18.2,$   
496  $20.3/23.4, 6.87/15.97, 4.5/9.4$ ). For SF, scaling levels are weakly but significantly shifted to less  
497 separation at large  $\tau_w$  (SF:  $P > 0.2$  except at 250 ms and 500 ms, with  $P = 0.026, 0.046, F(2, 716)$   
498 = 3.65, 3.09 respectively).

499  
500 An input set of type 2, made of Poisson spiketrains similar in terms of R but with varying  
501 firing rates (**Figure 5A1**), and an input set of type 3, with 10.5 Hz uncorrelated trains ( $R = 0$ )  
502 with varying burstiness (**Figure 5B1**), were designed to explore a wide range of input similarities  
503 as measured by SF and to characterize DG computations on inputs with a variety of statistical  
504 structures (Madar et al., 2019b). As we have shown before, the normal DG exhibits low pattern  
505 separation via scaling for highly similar inputs, and significant pattern convergence for dissimilar  
506 inputs (Madar et al., 2019b). In KA mice, GCs show a decrease in both pattern convergence and  
507 separation via scaling: the DG computation function is steeper, closer to the identity line,  
508 meaning that the DG of KA mice is weaker at transforming the similarity of its inputs in general

509 **(Figure 5A1 and B1)**. When similarity is measured with R or NDP (binwise synchrony code)  
510 instead of SF (neural code focused on FR and bursting), these experiments confirmed that pattern  
511 separation is decreased in TLE **(Figure 5A2)** and that this deficit is strongest when inputs are  
512 highly similar (i.e., when pattern separation is theoretically most important) and weaker when  
513 inputs are already dissimilar **(Figure 5B2)**.

514



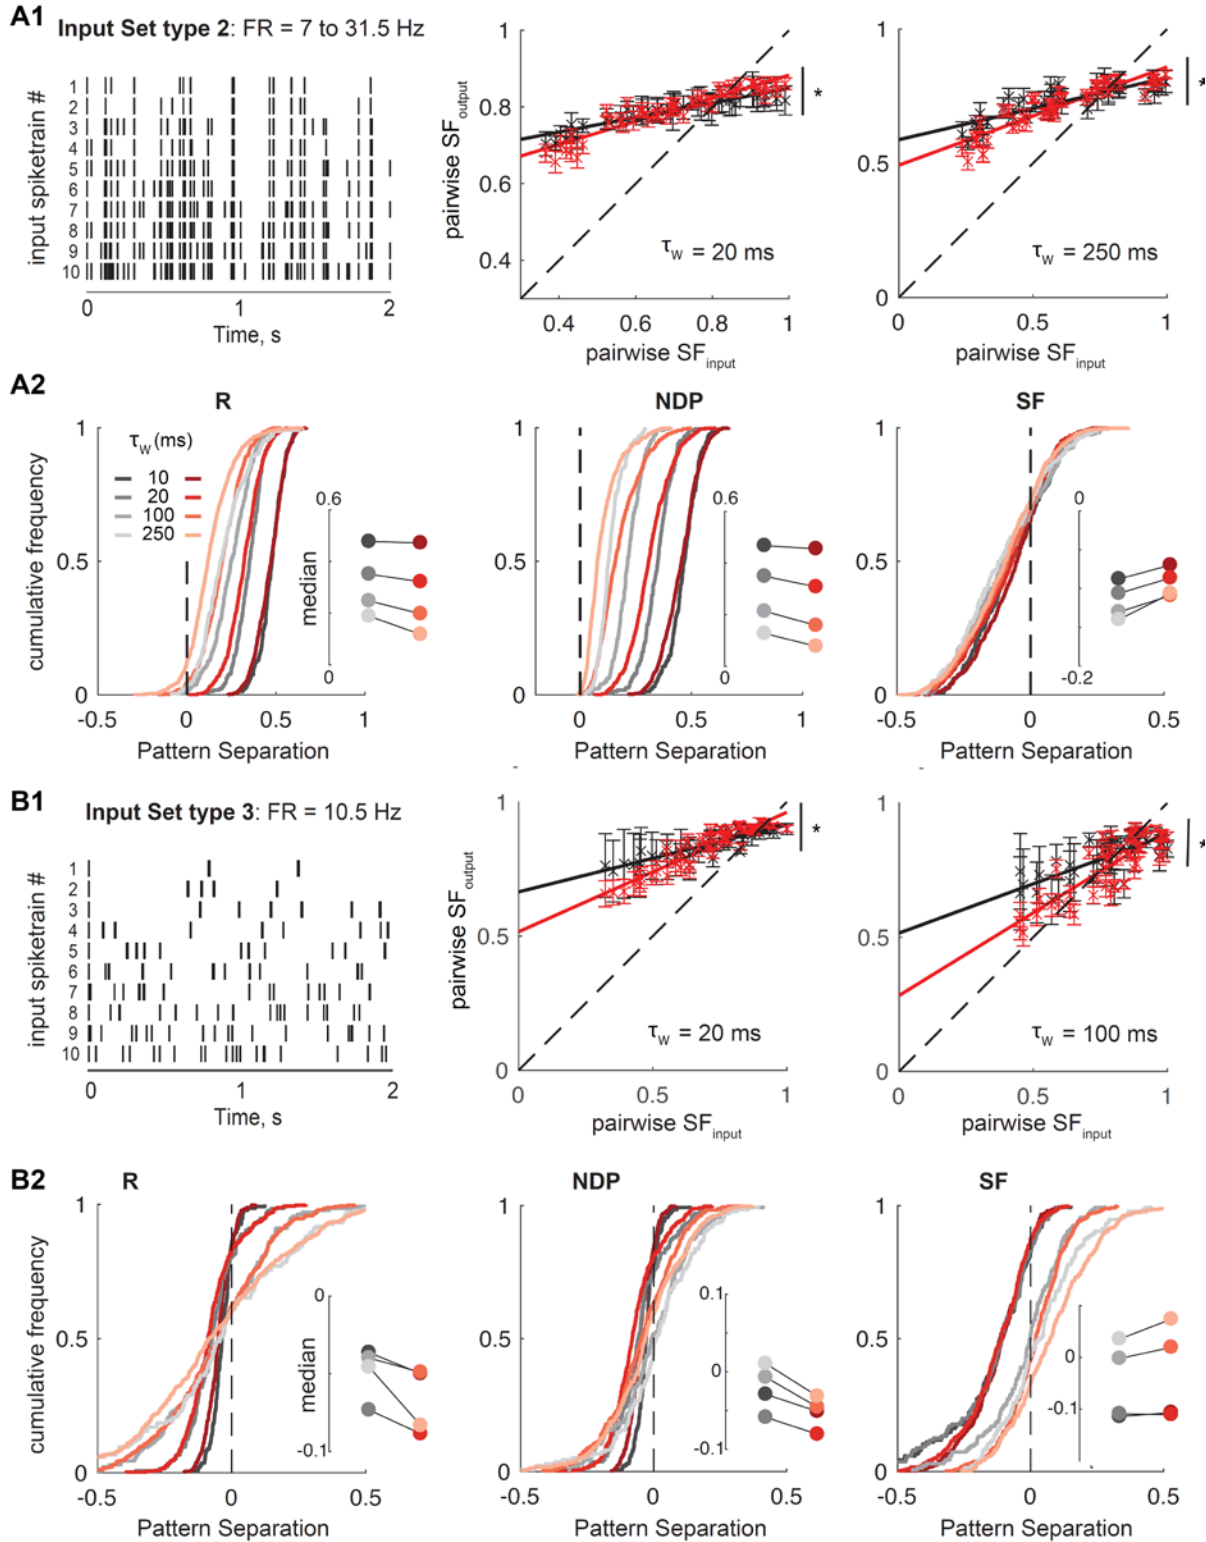

515

516 **Figure 5. Multiple DG computations are affected by epilepsy**

517 Our standard input sets (type 1, Figure 4) consisted of 10 Hz Poisson trains. Two other input sets  
518 (type 2 and 3) were designed to explore single GCs responses to inputs with diverse structures

519 and statistics, both with a wide range of pairwise similarity as measured by SF (in contrast to  
520 input sets of type 1).

521 **(A1) Left:** Input set type 2 was constituted of spiketrains following a Poisson distribution, each  
522 with a different firing rate (FR), but with an average  $R_{\text{input}}$  constrained around 0.75 ( $\tau_w = 10$  ms).  
523 *Middle and Right:* Pattern separation graphs showing the pairwise output spiketrain similarity as  
524 a function of the pairwise input similarity, as measured by SF with two different timescales,  
525 averaged across multiple GCs (KA: 16, Ctrl: 5). Distributions are significantly different,  
526 suggesting in particular that epilepsy causes a decrease in pattern convergence (via scaling) for  
527 low input similarities (ANCOVA with separate linear models, for  $\tau_w = 20$  and 250 ms  
528 respectively :  $P = 0.0016$  and  $< 0.0001$ ,  $F(2, 941) = 6.5$  and  $10.4$ ). **(A2)** Levels of pattern  
529 separation for type 2 inputs, measured using different similarity metrics and timescales as in  
530 Figure 4. It confirms that epilepsy decreases the separation of similar Poisson input spiketrains as  
531 measured by R and NDP, consistent with Figure 4, and shows that differences in terms of SF,  
532 although small, are significant (ANCOVA as in A1: R:  $P < 0.0001$  for  $\tau_w = 20$  ms up to 1000 ms,  
533  $P = 0.02$  and  $0.18$  for 5 and 10 ms; NDP and SF:  $P < 0.025$  for  $\tau_w$  up to 1000 ms. Detailed  
534 statistics for  $\tau_w = 5, 10, 20, 50, 100, 250, 500$  and 1000 ms respectively: R,  $P = 0.0243, 0.1820,$   
535  $<0.0001, <0.0001, <0.0001, <0.0001, <0.0001, <0.0001, F(2, 941) = 3.7, 1.7, 10.2, 15.1, 24.1,$   
536  $36.0, 50.2, 27.0$ ; NDP,  $P = 0.0022, 0.0240, <0.0001, <0.0001, <0.0001, <0.0001, <0.0001,$   
537  $<0.0001, F(2, 941) = 6.2, 3.7, 13.8, 17.4, 21.4, 26.0, 21.0, 16.8$ ; SF,  $P = 0.0002, 0.0012, 0.0016,$   
538  $0.0240, 0.0073, <0.0001, <0.0001, 0.0002, F(2, 941) = 8.7, 6.7, 6.5, 3.7, 4.9, 10.9, 10.4, 8.7$ ).

539 **(B1) Left:** Input set type 3 was constituted of spiketrains with 21 spikes (FR = 10.5Hz) that were  
540 distributed among bins to produce trains with varying burstiness (Madar et al., 2019b). R is close  
541 to 0 for all pairs. *Middle and Right:* same analysis as in A1 (KA: 8 GCs, Ctrl: 3 GCs).  
542 Distributions are significantly different, suggesting again that epilepsy causes a decrease in  
543 pattern convergence via scaling, for low input similarities (ANCOVA for  $\tau_w = 20$  and 100 ms:  $P$   
544  $< 0.0001$  and  $F(2, 491) = 10.3$  and  $13.8$  respectively).

545 **(B2)** Same analysis as in A2. The directions of impairments are the same as in A2, showing that  
546 epilepsy decreases pattern separation in terms of R and NDP but slightly improves it in terms of  
547 SF. The shift via scaling is weak but significant at all timescales, and larger at the longest  $\tau_w$ .  
548 ANCOVA: R,  $P < 0.05$  for  $\tau_w = 5, 10$  and 500 ms; NDP and SF,  $P < 0.007$  for  $\tau_w$  up to 500 ms.  
549 Detailed statistics for  $\tau_w = 5, 10, 20, 50, 100, 250, 500$  and 1000 ms respectively: R,  $P = 0.0451,$   
550  $0.0004, 0.3727, 0.7357, 0.9340, 0.4271, 0.0012, 0.2889, F(2, 491) = 3.1, 8.1, 1.0, 0.3, 0.1, 0.8,$   
551  $6.8, 1.2$ ; NDP,  $P = <0.0001, <0.0001, 0.0003, 0.0012, <0.0001, 0.0069, <0.0001, 0.4154, F(2,$   
552  $491) = 11.1, 24.3, 8.4, 6.8, 11.2, 5.0, 14.6, 0.9, SF, P = <0.0001, <0.0001, <0.0001, <0.0001,$   
553  $<0.0001, 0.0065, 0.0002, 0.0003, F(2, 941) = 42.1, 20.9, 10.3, 13.6, 13.8, 5.1, 8.5, 8.1$ .

554

555 *Pathological spiking patterns in a subset of GCs from epileptic mice.* What features of  
556 GC output spiketrains are changed in TLE to explain the difference in DG computations between  
557 KA and control mice? On visual inspection, we noticed that many KA neurons occasionally fired  
558 short bursts of action potentials after a single input pulse (**Figure 6A**), which is quite unusual for  
559 control GCs (Madar et al., 2019a). To determine whether there was a difference in the spiking

560 patterns of KA and control GCs, we measured three spiketrain features: 1) the average firing rate  
561 (FR) of a GC across a full recording set (fifty spiketrains), 2) the probability of spiking after a  
562 single input pulse (SP) and 3) the probability of bursting ( $p(\text{Burst})$ , i.e., more than one spike)  
563 after a single input pulse. Our results show that on average GCs from KA mice fire more  
564 faithfully after an input (**Figure 6B**) and also tend to fire in bursts (**Figure 6C-D**), which  
565 together lead to a higher FR (**Figure 6B, E**).

566 Closer inspection suggests that the distributions of SP,  $p(\text{Burst})$  and FR are different  
567 between KA and controls, with larger variance and upper tails for GCs from KA mice (**Figure**  
568 **6B-E**). Although we did not formally test for discrete clusters, visual inspection of Figure 6E  
569 shows that a subset of GCs from KA animals have higher SP,  $p(\text{Burst})$  and FR than any control  
570 GC. Thus, it appears that, following an epileptogenic insult, only a subset of GCs displayed  
571 pathological characteristics amidst a background of seemingly normal GCs.

572

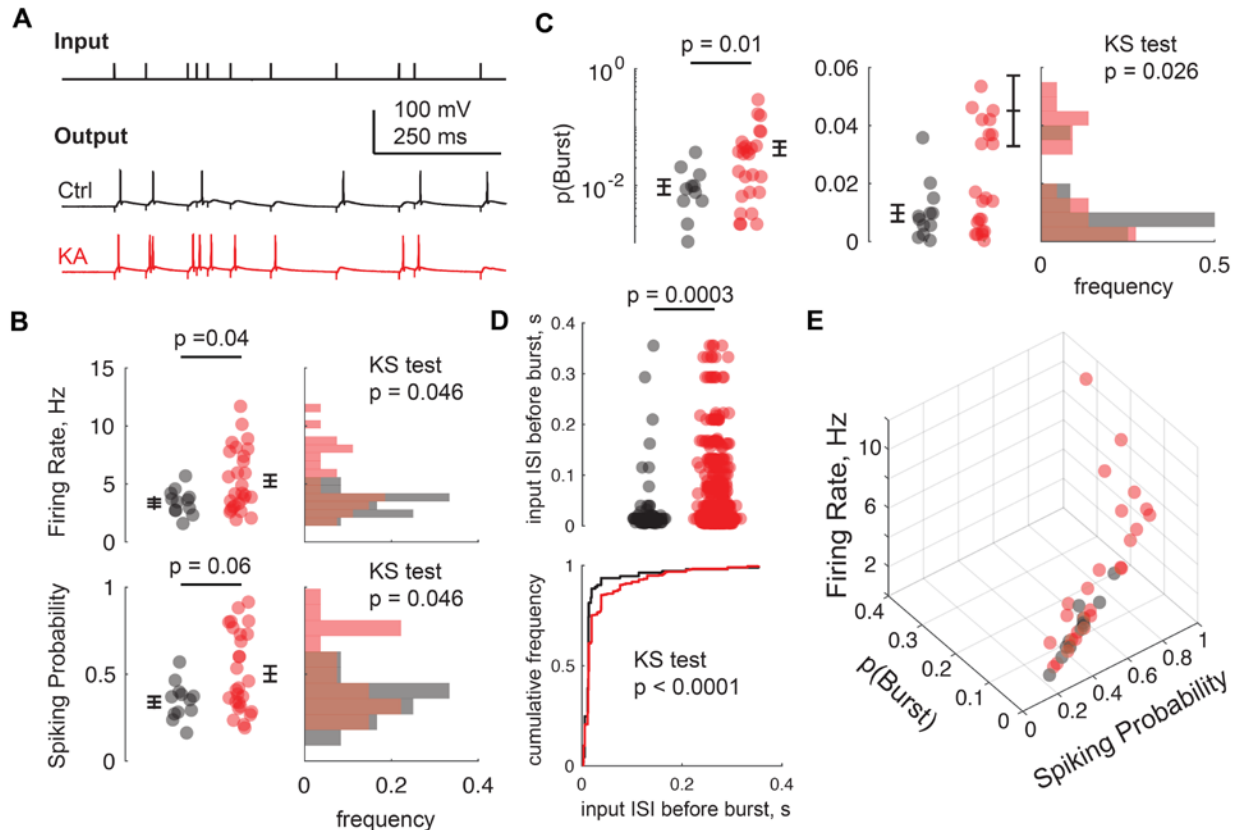

573  
574 **Figure 6. In epileptic mice, a subpopulation of GCs shows pathological spiking patterns**  
575 (A) Example of current-clamp recordings in GCs from a kainate-injected (KA) vs a control  
576 animal in response to the same Poisson input train, illustrating that some GCs from KA spiked  
577 more, and had a tendency to fire short bursts (2-4 spikes riding a single EPSP).  
578 (B-E) Some GCs from KA exhibited larger firing rates due to a higher probability of spiking at  
579 least once after an input spike (spiking probability), and sometimes a higher probability of  
580 spiking more than once between two input spikes ( $p(\text{Burst})$ ) than GCs from controls. The firing  
581 rate, spiking probability and  $p(\text{Burst})$  of a neuron were all computed as the average over the fifty  
582 sweeps of an output set from a pattern separation experiment (input set type 1, see Figure 4B).  
583 (B) *Left*: data points correspond to the same recordings as in Figure 4C (KA: 27; Ctrl: 12). Black  
584 dash and error bars are mean  $\pm$  SEM. A U-test was used to compare the medians, showing that  
585 on average FR and SP are higher in KA (FR:  $P = 0.0415$ ,  $Z = -2.04$ , rank sum = 172.5; SP:  $P =$   
586  $0.0613$ ,  $Z = -1.87$ , rank sum = 168.5). *Right*: Frequency distributions of the same data. A one-  
587 sided two-sample KS test shows that the KA distribution has a larger tail in both cases (FR and  
588 SP:  $P = 0.0465$ ,  $D = 0.4074$ ), indicating that a subset of KA GCs are pathological.  
589 (C) Same as in B for  $p(\text{Burst})$ . Note that the left graph has a  $\log_{10}$  scale showing all data points,  
590 whereas the middle graph has a linear scale zoomed in (i.e. not showing the 5 largest KA values).  
591 The graph on the right has the same scale as the middle graph. Together, they suggest that in KA,  
592 there might be a healthy population of GCs coexisting with a different population of  
593 pathologically bursty GCs (U-test:  $P = 0.0153$ ,  $Z = -2.16$ , rank sum = 168.5; KS test:  $P = 0.0259$ ,  
594  $D = 0.4444$ ).  
595 (D) Some bursts were detected by our algorithm in GCs from Ctrl mice, but the vast majority of  
596 those were due to the temporal summation of two EPSPs resulting from input spikes occurring  
597 close in time. In contrast, a large number of bursts in GCs from KA mice come after an isolated

598 input spike. *Top*: Time interval between the two input spikes (inter-spike-interval, ISI) preceding  
599 a given burst. Data points correspond to all detected bursts from the recordings in C. U-test:  $P =$   
600  $0.0003$ ,  $Z = -3.58$ , rank sum = 5906.2. *Bottom*: Cumulative frequency distributions of the same  
601 data. A one-sided two-sample KS test demonstrates that the distributions are different ( $P <$   
602  $0.0001$ ,  $D = 0.2699$ ).

603 (E) Same data as in B and C: the elbow in the distribution of SP, p(Burst) and FR values visually  
604 defines two clusters of neurons. One cluster contains GCs from both KA and Ctrl mice (with  
605 GCs from both groups spanning a large range of SP values but low p(Burst)) and can be  
606 considered "normal". In contrast, the other cluster, with highest SP combined with high p(Burst),  
607 contains only GCs from KA animals and can thus be considered "pathological".  
608

609       What is the origin of the pathological spiking patterns? We first controlled that  
610 stimulation intensities were comparable between treatment groups and were not causative of  
611 abnormal spiking patterns (**Figure 7A**). We next asked whether the abnormal firing came from  
612 changes in the synaptic drive. To answer this question, we measured the synaptic input-output  
613 relation (Ewell and Jones, 2010) by recording GCs first under current-clamp then under voltage-  
614 clamp, in response to the same pattern separation stimulus protocol (**Figure 7B1-2**). Our data  
615 show that the average excitatory drive per neuron was not different between KA and control  
616 groups, and that it does not predict burstiness (**Figure 7B3**). A finer grained analysis on the  
617 individual currents suggests that although the excitatory drive and the spiking output are  
618 correlated, high amplitude EPSCs are neither sufficient nor necessary to elicit a burst (**Figure**  
619 **7B4**). Bursting does not seem to result from other changes in excitatory input-output coupling  
620 either (**Figure 7B5**), which suggest that inhibition might be involved. GCs are indeed subjected  
621 to strong tonic, feedforward and feedback inhibition that controls the sparseness of their activity  
622 (Coulter and Carlson, 2007; Ewell and Jones, 2010; Pardi et al., 2015; Lee et al., 2016) and is  
623 altered in TLE (Alexander et al., 2016; Dengler and Coulter, 2016). We did not record evoked  
624 IPSCs directly but, in normal mice, partial block of inhibition elevates GC firing rates and causes  
625 bursts (Madar et al., 2019b) similar to what we observed here in KA mice. All our results thus

626 converge to support the hypothesis that pathological spiking arises from an excitation/inhibition  
 627 imbalance in a subset of GCs, likely driven by a decrease in inhibition.

628

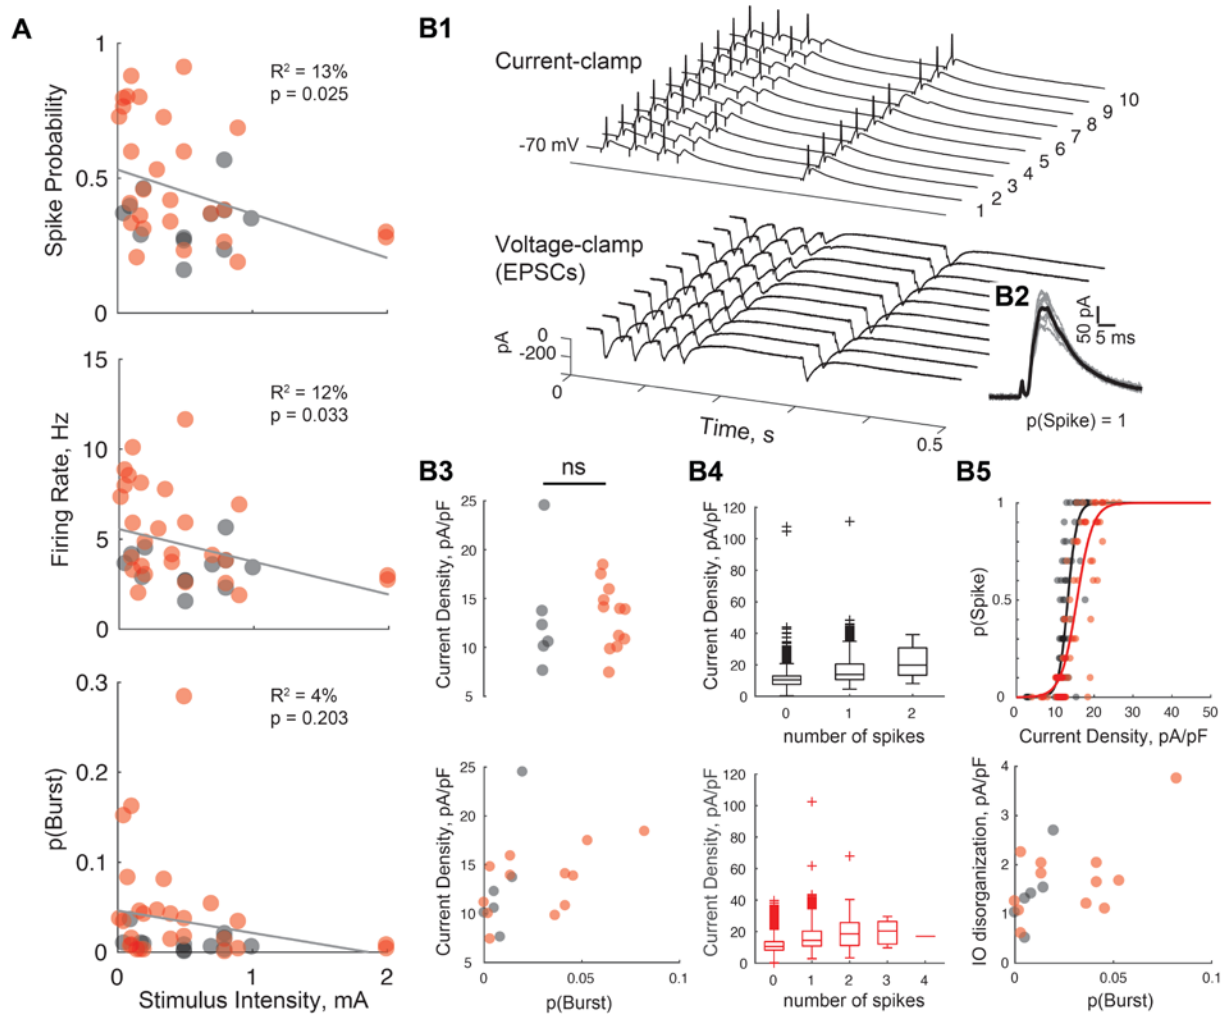

629

630 **Figure 7. Pathological bursting arises from an excitation/inhibition imbalance**

631 (A) Bursting and high firing rates were not an artefact of stimulation differences: The current  
 632 intensity of the electric stimulation did not significantly differ between KA and Ctrl (same  
 633 recordings as in Figure 4C and 6B-E, U-test:  $P = 0.2991$ ,  $Z = 1.04$ , rank sum = 274.5) and  
 634 stimulus intensity was a poor predictor of pathological firing patterns (as indicated by the low  $R^2$   
 635 values of linear regressions. For FR/SP/pBurst:  $R^2 = 12.75\%/11.69\%/4.35\%$ ,  $F(2,37) =$   
 636  $5.4/4.9/1.7$ ,  $P = 0.0257/0.0332/0.2027$ ).

637 (B) For a subset of neurons in A (KA: 12; Ctrl: 6), we followed the current-clamp recording with  
 638 a voltage-clamp recording ( $V_{\text{hold}} = -70\text{mV}$ ) in response to the same pattern separation protocol in  
 639 order to assess the excitatory synaptic drive and its relationship with spiking behavior. The  
 640 stimulus electrode location and current intensity was unchanged. (B1) Example of current-clamp  
 641 (top) and voltage-clamp (bottom) recording in the same GC from a Ctrl animal. Only the first

642 500 ms of the ten responses to repetitions of the first input train shown in Figure 4B are  
643 displayed. *Top*: action potentials are truncated at 0 mV. *Bottom*: stimulation artefacts and  
644 occasional unclamped spikes were blanked. **(B2)** The ten EPSCs (grey) associated to first pulse  
645 of input trains in B1 and the mean EPSC (black). We assessed the excitatory drive as the  
646 maximum inward current in the interval between each input pulse minus the current baseline  
647 (i.e., mode of the current over the full sweep).  $P(\text{Spike})$  was defined as the probability of spiking  
648 during this interval across the ten sweeps of the current-clamp recording. **(B3)** *Top*: The mean  
649 EPSC density for each neuron was not significantly different between KA and Ctrl (U-test:  $P =$   
650  $0.5532$ , rank sum = 50; two-sided two-sample KS test:  $P = 0.1935$ ,  $D = 0.4167$ ), suggesting that  
651 pathological spiking cannot be explained by larger EPSCs in KA mice. *Bottom*: Indeed, no clear  
652 relationship exists between  $p(\text{Burst})$  and the mean current density, as some GCs with a great  
653 synaptic drive do not exhibit much bursting, and vice versa. **(B4)** Consistently, the peak current  
654 density associated to each inter-input-interval in a recording is not well correlated to the  
655 corresponding number of spikes in the current-clamp trace, for both Ctrl (top) and KA (bottom).  
656 For example, excitatory currents of the same magnitude can be associated to 0, 1, 2, 3 or 4  
657 spikes. EPSC amplitude is thus not sufficient to explain the spiking output, which suggests that  
658 other factors, like reduced inhibition, are likely implicated in causing pathological bursts. **(B5)**  
659 *Top*: The average EPSC density between two input spikes is plotted against the corresponding  
660 probability of spiking  $p(\text{Spike})$ , as in Ewell and Jones (2010). The resulting input-output (IO)  
661 distribution is fitted with a sigmoid (two GCs representative of KA and Ctrl are shown). *Bottom*:  
662 In a subset of GCs, mostly from KA, The IO distribution appears disorganized and sometimes  
663 difficult to fit. A nonparametric proxy of this disorganization is the standard deviation (SD) of  
664 the current density, averaged across each level of  $p(\text{Spike})$  excluding  $p(\text{Spike}) = 0$  and 1. The  
665 average SD for a given GC was plotted against the propensity of that neuron to fire bursts. There  
666 is no clear relationship between these two quantities, suggesting that: 1) decoupling between the  
667 excitatory drive and spiking probability is not directly related to bursting and 2) a subset of GCs  
668 from KA with apparently healthy spiking patterns could already exhibit a more subtle but  
669 pathological IO disorganization.  
670

671           How do high FR and bursts relate to the DG computational impairment measured in KA  
672 mice? We first tested the hypothesis that higher GC firing rates and burstiness yield less pattern  
673 separation as measured with R (**Figure 8A**). In GCs of young mice, FR and pattern separation  
674 are related, but loosely (Madar et al., 2019a), whereas here in adult mice there is a strong linear  
675 relationship, such that GCs with pathologically high FR exhibit pathologically low pattern  
676 separation. Similarly, abnormal bursting corresponds to abnormally low levels of pattern  
677 separation. This analysis relates cell-wise spiking features (FR or  $p\text{Burst}$  averaged across all

678 spike trains of a recorded neuron) to a form of pattern separation that is not theoretically  
679 concerned with such features (Madar et al., 2019b).

680 Other forms of pattern separation, more directly related to FR or bursting, can in theory  
681 also be performed: for example by increasing spiketrain-to-spiketrain *variability* in FR or  
682 burstiness of the output neuron, even if the average quantities were identical (Madar et al.,  
683 2019b). Because pathological GCs only occasionally fired bursts, we asked whether TLE could  
684 affect such forms of pattern separation. To test this, we measured the spiketrain-to-spiketrain  
685 variability in FR as well as in two complementary measures of burstiness (occupancy and  
686 compactness, see **Materials and Methods – Neural pattern separation analysis**). For input  
687 sets of type 1 (10 Hz Poisson), GC output variability was slightly lower in terms of burstiness or  
688 FR. This weak type of pattern convergence disappeared in GCs from KA mice (**Figure 8B**). For  
689 input sets of type 2 and 3, no significant difference between KA and Ctrl was detected (**Figure**  
690 **8C-D**). Overall, Figure 8 suggests that TLE reduces DG neural pattern separation mostly by  
691 raising average levels of FR and burstiness, rather than through spiketrain-to-spiketrain  
692 variations of those features.

693



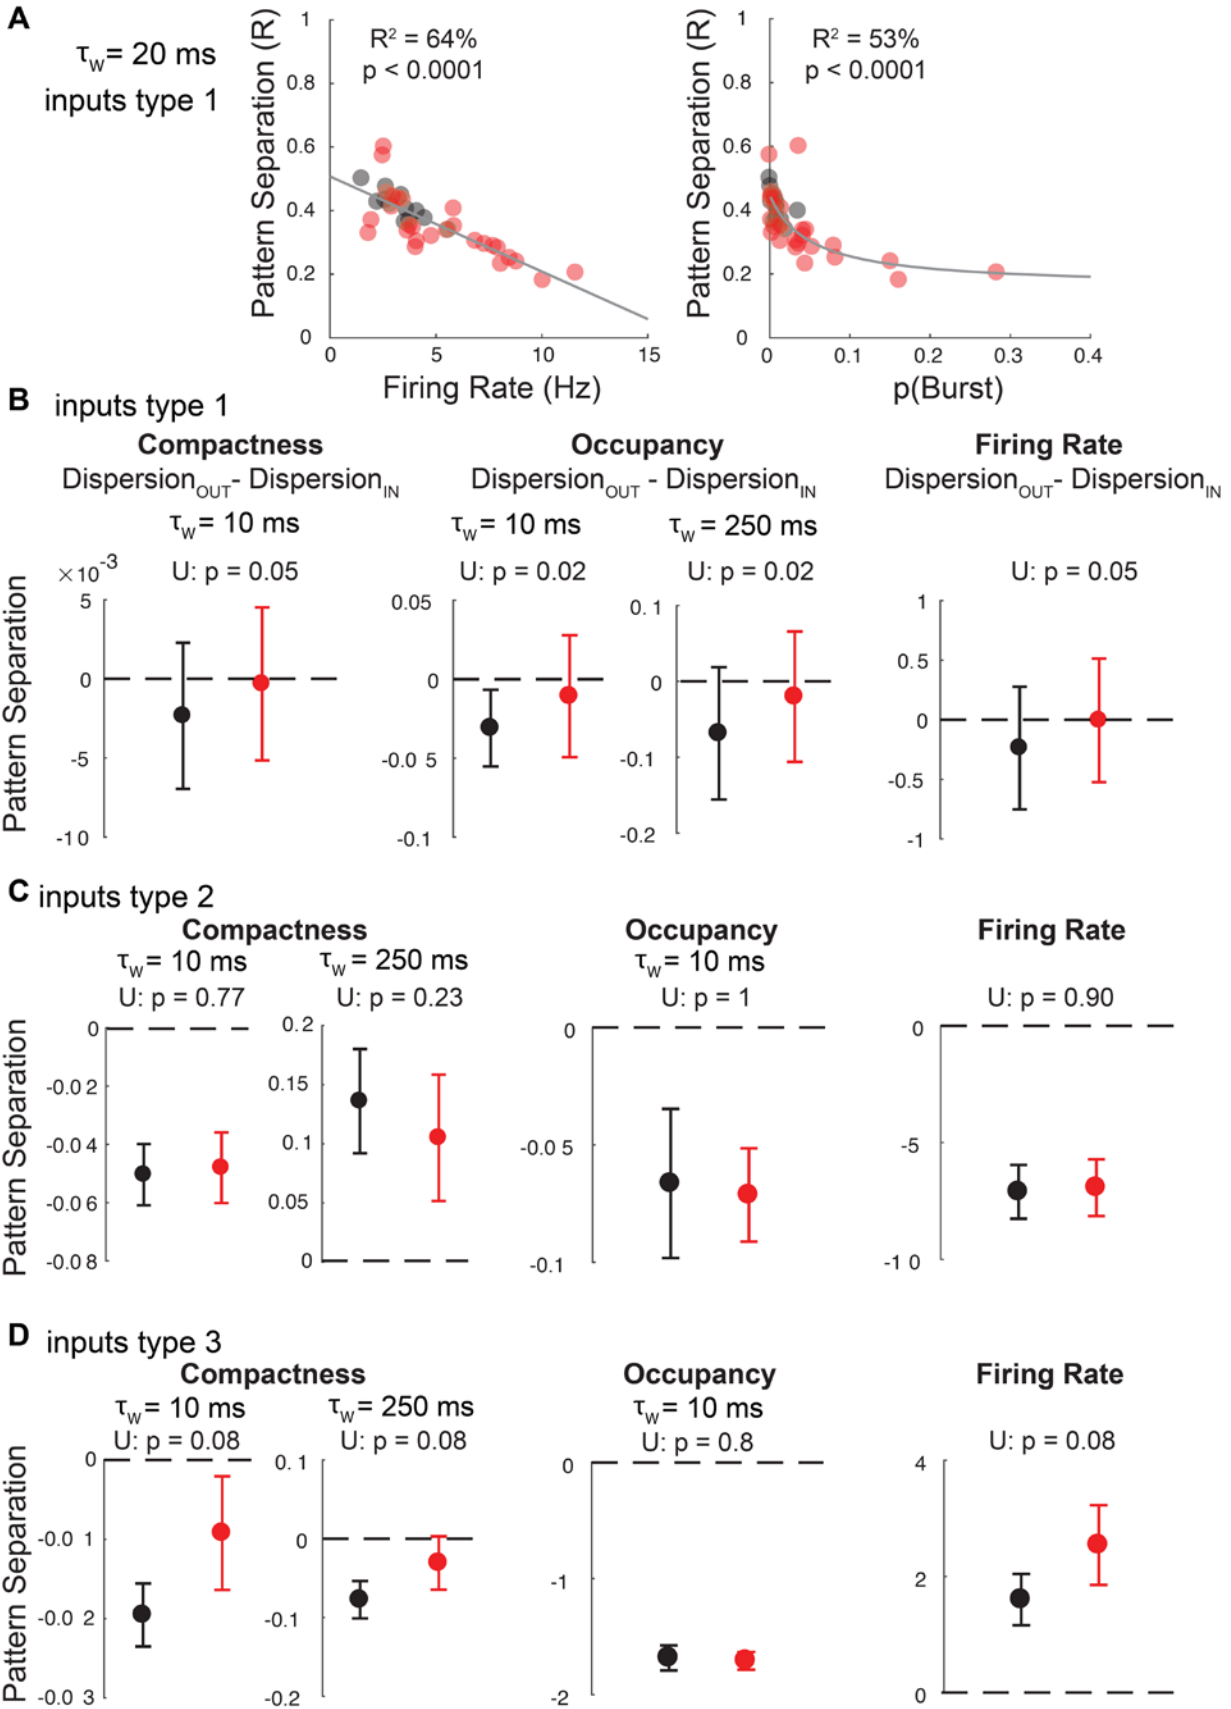

695 **Figure 8. Pathological spiking patterns explain pattern separation differences in epilepsy**  
696 (A) Neurons with high average firing rates and burstiness exhibit lower pattern separation  
697 (computed as  $R_{\text{input}} - R_{\text{output}}$ ). Same data as in Figure 4C and 6B-C. There is a strong linear  
698 relationship between firing rates and decorrelation (Grey line,  $R^2 = 63.68\%$ ,  $F(2,37) = 64.9$ ,  $P <$   
699  $0.0001$ ). The relationship between  $p(\text{Burst})$  and decorrelation is better described by an inverse  
700 function with a horizontal asymptote (see Methods – Software and statistics):  $R^2 = 53.1\%$ ,  $R^2$   
701 adjusted for 3 parameters =  $50.5\%$ ,  $F(3,36) = 20.4$ ,  $P < 0.0001$ .  
702 (B-D) Mean  $\pm$  SEM pattern separation levels across recordings when considering burstiness  
703 codes (Compactness or Occupancy) or a rate code (spiking frequency across a 2s sweep) instead  
704 of the binwise synchrony code assumed by R. Compactness is the proportion of time bins with at  
705 least one spike, whereas occupancy is the average number of spikes in a bin. Pattern separation  
706 corresponds to more dispersion in compactness, occupancy or firing rate in the output spiketrains  
707 than the input spiketrains. Negative values mean there is pattern convergence. U-tests comparing  
708 medians of GCs from KA and Ctrl groups were performed (p-values in panel).  
709 (B) In response to input sets of type 1 (10 Hz Poisson trains, same recordings as in A and Figure  
710 4), GCs exhibit low levels of convergence, if any, in terms of compactness, occupancy and rate  
711 codes, and these levels are slightly but significantly shifted to less convergence in GCs from KA  
712 for  $\tau_w = 10$  ms. This means that the relationships between firing rate or burstiness and pattern  
713 decorrelation observed in A is not due to variations of the firing rate or burstiness across sweeps.  
714 Detailed statistics at 10, 20, 50, 100, 250 ms, Compactness:  $P = 0.0482, .1892, .1628, .2925,$   
715  $.7584$ ,  $Z = -1.97, -1.97, -1.31, -1.39, 0.31$ , rank sum = 745, 745, 801, 794, 939 ; Occupancy:  $P =$   
716  $0.0177, 0.2586, 0.3624, 0.1425, 0.0211$ ,  $Z = -2.37, -1.13, -0.91, -1.47, -2.31$ , rank sum = 712.5,  
717  $816.5, 835, 788, 717$ ; FR:  $P = 0.0553$ ,  $Z = -1.92$ , rank sum = 750.  
718 (C) In response to an input set of type 2 (Poisson trains with different firing rates, same  
719 recordings as in Figure 5A), GCs from KA and Ctrl do not show significant differences ( $P > 0.2$   
720 for all timescales and codes). Detailed statistics at 10, 20, 50, 100, 250 ms, Compactness:  $P =$   
721  $0.7726, 0.7726, 0.8365, 0.9014, 0.2312$ ,  $Z = -0.29, -0.29, -0.21, 0.12, 1.20$ , rank sum = 51, 51,  
722 52, 57, 70; Occupancy:  $P = 1, 1, 0.9671, 0.5915, 0.2006$ ,  $Z = 0, 0, 0.04, -0.54, -1.28$ , rank sum =  
723 55, 55, 56, 48, 39; FR:  $P = 0.9014$ ,  $Z = -0.12$ , rank sum = 53.  
724 (D) In response to an input set of type 3 (10 Hz trains with varying compactness and occupancy,  
725 same recordings as in Figure 5B), GCs exhibit convergence in terms of compactness and  
726 occupancy and separation in terms of rate codes. Only computations in terms of compactness and  
727 firing rate are mildly shifted in GCs from KA for  $\tau_w = 10$  ms. Detailed statistics at 10, 20, 50,  
728 100, 250 ms, Compactness:  $P = 0.0848$ , rank sum = 9; Occupancy:  $P = 0.8, 0.7758, 0.9212,$   
729  $0.3758, 1$ , rank sum = 19.5, 20, 17, 23, 18; FR:  $P = 0.0848$ , rank sum = 9.  
730

731 *Electrographic, behavioral and computational pathologies in individual mice.* We have  
732 shown that, on average, KA mice develop EEG abnormalities (**Figure 2**), suffer mnemonic  
733 discrimination impairments (**Figure 3**) and have a bursting subpopulation of GCs with pattern  
734 separation deficits (**Figures 4-8**). Because we often performed all of the aforementioned  
735 experiments in the same mice, we next asked how those different epilepsy-related pathologies

736 are linked at the individual level (**Figure 9**). In a simple framework where behavioral  
737 impairments are caused by computational deficits that are due to reorganization of DG network  
738 function that also leads to an increase in epileptiform EEG events, one could expect a simple  
739 relationship between all the variables we measured. Interestingly, our data suggest a more  
740 complex view. For example, animals with few interictal spikes may still harbor some  
741 pathological neurons (**Figure 9A**) and be highly impaired at the BPS task (**Figure 9B**). This  
742 shows that both DG network pathologies and mnemonic impairments can occur independent of,  
743 or before, early EEG abnormalities. Inversely, both normal and pathological GCs were recorded  
744 in mice with more advanced EEG pathology, which confirms that those two subpopulations can  
745 coexist in the same KA animal (**Figure 9A**). Mice with clearly epileptiform EEG activity can  
746 also sometimes perform normally on the BPS task (**Figure 9B**). The variability in individual  
747 behavior and in cell sampling prevents us to definitively conclude on the relationship between  
748 single-cell pattern separation and mnemonic discrimination but, importantly, KA animals with  
749 the largest cognitive impairments all had at least one pathological recorded GC (**Figure 9C**).  
750 Finally, in cases where EEG, BPS and patch-clamp data were all obtained from each animal, the  
751 combination of these measurements yielded a very obvious separation between normal and KA  
752 subjects. Overall, our results suggest that epilepsy-related pathologies do not all develop in  
753 concert and that computational, behavioral and electrographic measures provide complementary  
754 informative dimensions that, together, better assess the epileptic state than any single dimension  
755 or pair of dimensions.

756

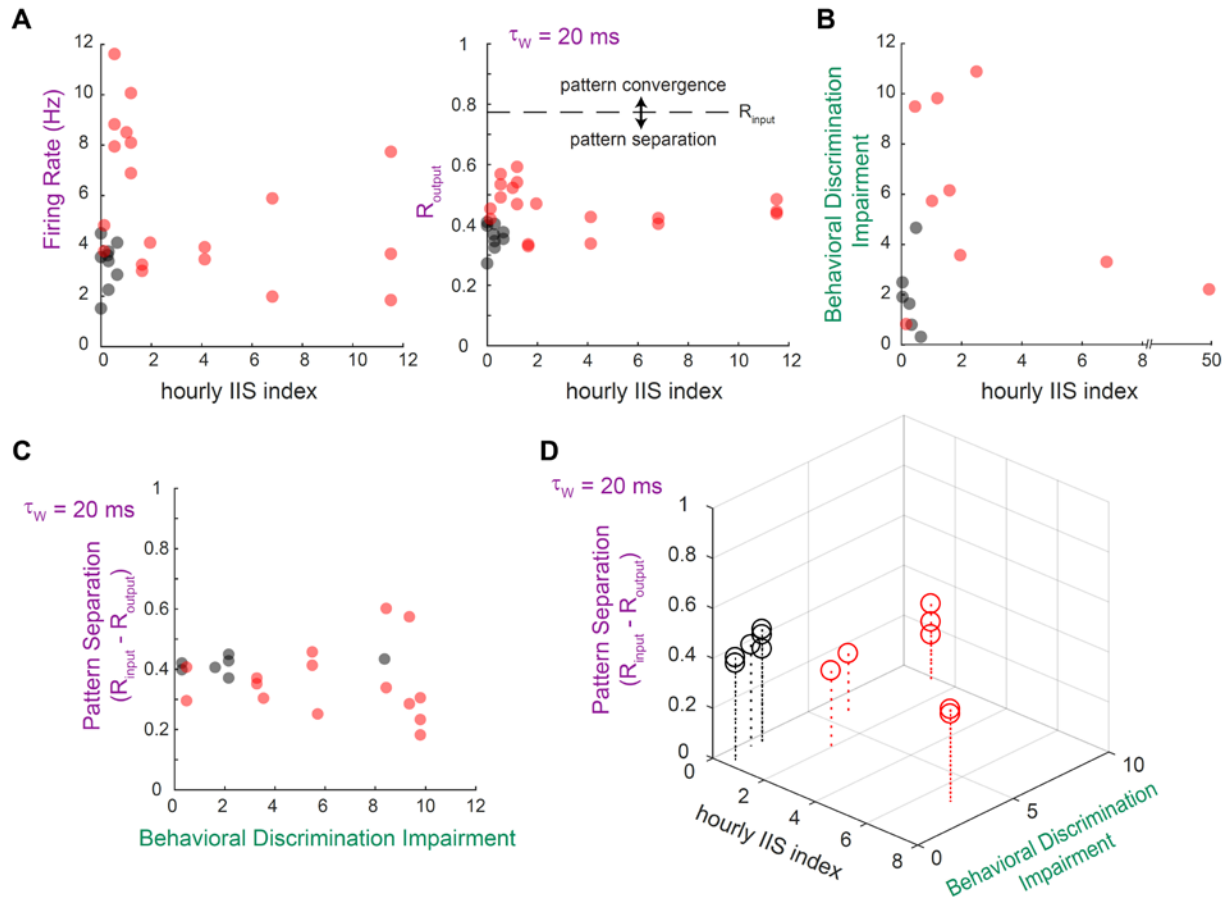

757

758 **Figure 9. EEG, behavioral and computational measures provide complementary insights**  
 759 **about epileptic pathology in individual animals.**

760 (A-D) Scatter plots relating the electrographic measure of IISs developed in Figure 2 (black axis  
 761 labels), measures from patch-clamp recordings of individual GCs from the same animals (purple  
 762 axis labels) and a summary score of behavioral discrimination impairment described in Figure  
 763 3C (green axis labels). Not all three types of records are available for every animal, which leads  
 764 to differences in the samples shown in each panel.

765 (A) Data points correspond to individual GCs from animals in which both IISs and patch-clamp  
 766 data were recorded. Each animal has a unique average hourly IIS index value. Only a subset of  
 767 GCs are outside of the Ctrl range (i.e. pathological). For example, in the mouse with the highest  
 768 IIS index ( $\sim 12$ ), only one of the three recorded GCs exhibited a pathological FR ( $\sim 8$  Hz, left  
 769 panel) and all had a similar  $R_{output}$  slightly above the Ctrl range ( $\sim 0.5$ , right panel). In contrast,  
 770 some GCs with abnormally high FR ( $\sim 6-12$  Hz) and  $R_{output}$  ( $\sim 0.5-0.6$ ) came from animals with  
 771 low IIS index ( $\sim 0-2$ ).

772 (B) Data points correspond to individual animals in which both IISs and BPS were measured. In  
 773 KA animals, low IIS index can correspond to either normal or abnormal mnemonic  
 774 discrimination, and despite having a high IIS index, some animals have normal discrimination.

775 (C) Data points correspond to individual GCs from animals in which both BPS and patch-clamp  
 776 data were recorded. In some KA mice with large behavioral impairments and multiple recorded  
 777 GCs, some GCs exhibited normal pattern separation whereas others showed pathologically low  
 778 levels. The relationship is unclear, but all KA mice with large impairments had at least one  
 779 pathological GC.

780 **(D)** Data points correspond to individual GCs from animals in which IISs, BPS and patch-clamp  
781 data were all collected. Stems show which GCs were recorded from each animal. The lower right  
782 corner would correspond to the highest pathology in electrographic, behavioral and  
783 computational categories. Despite any heterogeneity or apparent ambiguity when only one or  
784 two of these measures are considered (above), when all three measures are available for each  
785 animal, the KA group is very clearly separable from the Ctrl group.  
786

## 787 **Discussion**

788 We provide the first experimental evidence that TLE is characterized by both mnemonic  
789 discrimination impairments and neuronal pattern separation deficits, associated with pathological  
790 spiking behavior in a subset of GCs.

791 *Cognitive and computational deficits in TLE.* Our findings are consistent with the few  
792 previous studies that focused on similar questions. First, our data in human patients confirm the  
793 findings of Reyes et al. (2018) that TLE leads to mnemonic discrimination impairments.  
794 However, they used a different behavioral paradigm: a short-term memory object-location  
795 discrimination task akin to the task we used for mice. Although animal studies suggest that DG is  
796 necessary for such spatial mnemonic discrimination (Hunsaker and Kesner, 2013; Bui et al.,  
797 2018), it remains unclear whether this is the case in humans. In contrast, we used a non-spatial  
798 memory discrimination task that is known to be DG-dependent in humans (Baker et al., 2016;  
799 Stark et al., 2019), allowing us to conclude that impairments in TLE patients are likely due to  
800 DG alterations.

801 Our behavioral experiment in mice (**Figure 3**) also complements a previous study (Bui et  
802 al., 2018) by testing short-term (minutes) rather than long-term (24h) object-location memory  
803 and by testing multiple, parameterized levels of mnemonic interference, as recommended for  
804 rigorous testing of mnemonic discrimination (Hunsaker and Kesner, 2013; Liu et al., 2016). As  
805 in humans, the BPS task we used in mice is likely dependent on DG activity (Bui et al., 2018).

806 Taken together, our results and those studies suggest that mnemonic discrimination deficits  
807 observed in TLE are shared between humans and mice, occur for different types of memory and  
808 modalities, and point to DG malfunctions.

809 Indeed, DG normally functions as a pattern separator (Madar et al., 2019a) which is  
810 hypothesized to support mnemonic discrimination. However, only one modelling study has so far  
811 investigated the impact of TLE-related DG pathologies on neural pattern separation (Yim et al.,  
812 2014). This model suggested that mossy fiber sprouting and increased synaptic transmission  
813 from the perforant path to GCs, both hallmarks of TLE, can theoretically lead to a breakdown of  
814 pattern separation. Our results experimentally confirm that TLE leads to a deficit in neural  
815 pattern separation (**Figure 4**). However, the deficit we observed is not as large, possibly because  
816 the model 1) considered synaptic transmission as deterministic rather than probabilistic and  
817 plastic, 2) assessed a different form of pattern separation (patterns were defined as population  
818 ensembles of very short spiketrains, thus focusing on a population code whereas we investigated  
819 temporal codes) and 3) considered more severe degrees of epilepsy than was perhaps the case for  
820 our mice.

821 Note that by using several similarity metrics, timescales and input statistical structures,  
822 and thus exploring various potential neural codes, we also discovered that other normal DG  
823 computations performed through rate and burstiness codes are perturbed in TLE (**Figure 5, 8**).

824 *The role of sparsity in neuronal pattern separation and DG gating.* We found that GCs  
825 from epileptic mice exhibit pathological spiking consistent with a breach of the DG gatekeeper  
826 function (**Figure 6**) that leads to decreased neuronal pattern separation (**Figure 8A**). As noted by  
827 others, the gating and pattern separation functions of DG may be related (Dengler and Coulter,  
828 2016) because the filtering of incoming cortical activity into a sparser output can be a simple

829 mechanism underlying a form of pattern separation based on a pure population code (O'Reilly  
830 and McClelland, 1994; Severa et al., 2016; Dieni et al., 2016; Cayco-Gajic and Silver, 2019).  
831 Our results suggest that maintaining a sparse output also supports pattern separation of  
832 spiketrains in the time domain, at the level of single DGs.

833         Rare investigations of the spiking output of single GCs in epileptic tissue have reported  
834 that single stimulation of the perforant path sometimes leads GCs to fire bursts of spikes (Lynch  
835 et al., 2000; Kobayashi and Buckmaster, 2003). We expand on this by showing that bursts also  
836 emerge in response to complex, naturalistic stimulation patterns (**Figures 6 and 7**). It is  
837 important to note that occasional bursting is observed in normal GCs in vivo (Pernía-Andrade  
838 and Jonas, 2014), but this is very unusual in slices (Mongiat et al., 2009; Ewell and Jones, 2010;  
839 Zhang et al., 2012; Dieni et al., 2016). In our experiments, bursting GCs therefore demonstrate a  
840 breach of the dentate gate. Because bursts are known to be more efficient at driving spiking in  
841 CA3 pyramidal neurons (Henze et al., 2002), a single GC firing bursts will have a higher  
842 probability of making downstream CA3 pyramidal cells fire. This could have deleterious effects  
843 on memory encoding and promote seizures, as more active CA3 neurons would 1) increase the  
844 chance of overlap between memory representations and 2) overexcite a recurrent excitatory  
845 circuit, a mechanism of seizure generation. Thus, our findings are consistent with the idea that  
846 pathological firing or bursting of even a subset of GCs could simultaneously contribute to  
847 deficits in mnemonic discrimination and epileptiform activity in TLE.

848         Our study also provides new insight on the mechanisms underlying GCs increased ability  
849 to burst by testing the influence of the excitatory drive (**Figure 7B**). The main source of  
850 excitation to GCs, the perforant path, is sometimes assumed to be augmented in TLE (Yim et al.,  
851 2014) given evidence of increased release probability at the lateral perforant path synapse

852 (Scimemi et al., 2006). Our results do not directly contradict this, but we did not find a difference  
853 in the average synaptic current evoked in GCs by Poisson input spiketrains applied to the  
854 perforant path (**Figure 7B3**). More work is required to carefully test potential TLE-related  
855 changes in the coupling between perforant path and GCs, as well as EPSC kinetics and short-  
856 term dynamics (Madar et al., 2019a), but it is clear that the size of excitatory drive alone is not a  
857 good predictor of bursting propensity in GCs (**Figure 7B3-4**). We also previously showed that  
858 partial blockade of inhibition can produce GC bursting and pattern separation deficits (Madar et  
859 al., 2019b). Thus, in accordance with past research (Kobayashi and Buckmaster, 2003), we  
860 conclude that the strong decrease in synaptic inhibition characteristic of TLE (Dengler and  
861 Coulter, 2016; Dengler et al., 2017) is likely the main driver of pathological bursting.

862         Perhaps the most intriguing insight we bring on the failure of the DG as a gate and  
863 pattern separator in TLE is that this failure occurs only in a subset of GCs, upon a background of  
864 apparently normal GCs in the same the epileptic network. This finding invites many more  
865 questions: In the epileptic DG, is there a spectrum of spiking patterns among GCs going from  
866 normal to pathological, or are there two discrete types? What is the ratio of normal to  
867 pathological GCs? Does this ratio evolve during epileptogenesis? What makes individual GCs  
868 become pathological? Is that due to differences in intrinsic properties or networking? As  
869 explained above, our results suggest deficits in inhibition, but other anatomical or biophysical  
870 changes could be in play. For example, in individual mice with TLE, some GCs display  
871 pathological hilar basal dendrites that have been associated with increased intrinsic excitability  
872 that might allow them to fire bursts more easily (Kelly and Beck, 2017). It is also possible that  
873 there exist heterogeneity in GC mossy fiber sprouting, with some GCs receiving recurrent  
874 excitatory connections and some not. Some of these differences could be related to different



875 birthdates of adult-born GCs relative to an epileptogenic brain insult, resulting in only a subset of  
876 GCs integrating abnormally into the DG network (Kron et al., 2010). Alternatively, pathological  
877 GCs could develop from a more susceptible and active subclass of mature GCs (Erwin et al.,  
878 2019). In any case, the discovery that the GC population in the epileptic DG is not homogeneous  
879 in terms of spiking patterns is a crucial step towards developing new treatments that would  
880 specifically target pathological neurons to avoid deleterious side-effects (Bielefeld et al., 2014).

881 *The link between mnemonic discrimination, pattern separation and TLE.* For thirty  
882 years the DG has been hypothesized to support mnemonic discrimination by performing  
883 neuronal pattern separation (Treves et al., 2008), but no experiment has yet directly connected  
884 DG input-output computations with memory. Important reports have shown that 1) abnormal  
885 neurotransmission in the DG can lead to overlapping spatial representations in CA3 as well as  
886 impairments in context discrimination learning (McHugh et al., 2007) and 2) that overlapping  
887 engrams in DG are a cause of confusion between the associated memories (Ramirez et al., 2013).  
888 However, those reports did not investigate whether pattern separation was performed in the DG  
889 per se, as opposed to upstream areas. Here, we confirm our previous work showing that the DG  
890 itself performs temporal pattern separation (Madar et al., 2019a, b) and we show that, on  
891 average, a deficit in pattern separation is associated with a deficit in mnemonic discrimination. A  
892 full demonstration of the causal link will require measuring and manipulating DG computations  
893 in vivo during episodic memory tasks, but our study is a preliminary step toward understanding  
894 how DG circuit-level computations relate to a high-level cognitive function and how these  
895 processes fail in TLE. A mechanistic understanding of this relation may lead to new early  
896 diagnosis tools (e.g. cognitive tests like in Figure 1) as well as therapies alleviating memory  
897 disorders in TLE. For example, our finding that a subset of GCs with pattern separation deficits

898 can develop without EEG hallmarks of epilepsy (**Figure 9A**) suggests a mechanism for memory  
899 impairments that often occur in early stages of human epileptogenesis (Jones et al., 2007; Witt  
900 and Helmstaedter, 2015) and the coexistence of pathological and normal neurons could explain  
901 memory impairments without hippocampal sclerosis (Rayner et al., 2019).

## 902 References

- 903  
904 Alexander A, Maroso M, Soltesz I (2016) Organization and control of epileptic circuits in temporal lobe epilepsy.  
905 *Progress in brain research* 226:127-154.
- 906 Artinian J, Peret A, Marti G, Epszstein J, Crepel V (2011) Synaptic kainate receptors in interplay with INaP shift the  
907 sparse firing of dentate granule cells to a sustained rhythmic mode in temporal lobe epilepsy. *The Journal*  
908 *of neuroscience : the official journal of the Society for Neuroscience* 31:10811-10818.
- 909 Baker S, Vieweg P, Gao F, Gilboa A, Wolbers T, Black SE, Rosenbaum RS (2016) The Human Dentate Gyrus  
910 Plays a Necessary Role in Discriminating New Memories. *Current biology : CB*.
- 911 Behr J, Lyson KJ, Mody I (1998) Enhanced propagation of epileptiform activity through the kindled dentate gyrus.  
912 *Journal of neurophysiology* 79:1726-1732.
- 913 Bennett IJ, Stark CE (2016) Mnemonic discrimination relates to perforant path integrity: An ultra-high resolution  
914 diffusion tensor imaging study. *Neurobiology of learning and memory* 129:107-112.
- 915 Berron D, Schutze H, Maass A, Cardenas-Blanco A, Kuijf HJ, Kumaran D, Duzel E (2016) Strong Evidence for  
916 Pattern Separation in Human Dentate Gyrus. *The Journal of neuroscience : the official journal of the*  
917 *Society for Neuroscience* 36:7569-7579.
- 918 Bielefeld P, van Vliet EA, Gorter JA, Lucassen PJ, Fitzsimons CP (2014) Different subsets of newborn granule  
919 cells: a possible role in epileptogenesis? *The European journal of neuroscience* 39:1-11.
- 920 Bui AD, Nguyen TM, Limouse C, Kim HK, Szabo GG, Felong S, Maroso M, Soltesz I (2018) Dentate gyrus mossy  
921 cells control spontaneous convulsive seizures and spatial memory. *Science* 359:787-790.
- 922 Cayco-Gajic NA, Silver RA (2019) Re-evaluating Circuit Mechanisms Underlying Pattern Separation. *Neuron*  
923 101:584-602.
- 924 Chavlis S, Poirazi P (2017) Pattern separation in the hippocampus through the eyes of computational modeling.  
925 *Synapse (New York, NY)*.
- 926 Coras R, Pauli E, Li J, Schwarz M, Rossler K, Buchfelder M, Hamer H, Stefan H, Blumcke I (2014) Differential  
927 influence of hippocampal subfields to memory formation: insights from patients with temporal lobe  
928 epilepsy. *Brain : a journal of neurology* 137:1945-1957.
- 929 Coulter DA, Carlson GC (2007) Functional regulation of the dentate gyrus by GABA-mediated inhibition. 163:235-  
930 812.
- 931 De Maesschalck R, Jouan-Rimbaud D, Massart DL (2000) The mahalanobis distance. *Chemometrics and intelligent*  
932 *laboratory systems* 50:1-18.
- 933 Dengler CG, Coulter DA (2016) Normal and epilepsy-associated pathologic function of the dentate gyrus. *Progress*  
934 *in brain research* 226:155-178.
- 935 Dengler CG, Yue C, Takano H, Coulter DA (2017) Massively augmented hippocampal dentate granule cell  
936 activation accompanies epilepsy development. *Scientific reports* 7:42090.
- 937 Dieni CV, Panichi R, Aimone JB, Kuo CT, Wadiche JI, Overstreet-Wadiche L (2016) Low excitatory innervation  
938 balances high intrinsic excitability of immature dentate neurons. *Nature communications* 7:11313.
- 939 Dillon SE, Tsivos D, Knight M, McCann B, Pennington C, Shiel AI, Conway ME, Newson MA, Kauppinen RA,  
940 Coulthard EJ (2017) The impact of ageing reveals distinct roles for human dentate gyrus and CA3 in  
941 pattern separation and object recognition memory. *Scientific reports* 7:14069.
- 942 Erwin SR, Sun W, Copeland M, Lindo S, Spruston N, Cembrowski MS (2019) A sparse, spatially biased subtype of  
943 mature granule cell is preferentially recruited in hippocampal-associated behaviors. *bioRxiv:804393*.
- 944 Ewell LA, Jones MV (2010) Frequency-tuned distribution of inhibition in the dentate gyrus. *The Journal of*  
945 *neuroscience : the official journal of the Society for Neuroscience* 30:12597-12607.
- 946 Groticke I, Hoffmann K, Loscher W (2008) Behavioral alterations in a mouse model of temporal lobe epilepsy  
947 induced by intrahippocampal injection of kainate. *Experimental neurology* 213:71-83.

- 948 Hellier JL, Patrylo PR, Buckmaster PS, Dudek FE (1998) Recurrent spontaneous motor seizures after repeated low-  
949 dose systemic treatment with kainate: assessment of a rat model of temporal lobe epilepsy. *Epilepsy*  
950 *research* 31:73-84.
- 951 Helmstaedter C, Kurthen M, Lux S, Reuber M, Elger CE (2003) Chronic epilepsy and cognition: a longitudinal  
952 study in temporal lobe epilepsy. *Annals of neurology* 54:425-432.
- 953 Henze DA, Wittner L, Buzsaki G (2002) Single granule cells reliably discharge targets in the hippocampal CA3  
954 network in vivo. *Nature neuroscience* 5:790-795.
- 955 Hsu D (2007) The dentate gyrus as a filter or gate: a look back and a look ahead. *Progress in brain research* 163:601-  
956 613.
- 957 Hunsaker MR, Kesner RP (2013) The operation of pattern separation and pattern completion processes associated  
958 with different attributes or domains of memory. *Neuroscience and biobehavioral reviews* 37:36-58.
- 959 Inostroza M, Brotons-Mas JR, Laurent F, Cid E, de la Prida LM (2013) Specific impairment of “what-where-when”  
960 episodic-like memory in experimental models of temporal lobe epilepsy. *Journal of Neuroscience*  
961 33:17749-17762.
- 962 Jones JE, Watson R, Sheth R, Caplan R, Koehn M, Seidenberg M, Hermann B (2007) Psychiatric comorbidity in  
963 children with new onset epilepsy. *Developmental medicine and child neurology* 49:493-497.
- 964 Kelly T, Beck H (2017) Functional properties of granule cells with hilar basal dendrites in the epileptic dentate  
965 gyrus. *Epilepsia* 58:160-171.
- 966 Kesner RP, Rolls ET (2015) A computational theory of hippocampal function, and tests of the theory: new  
967 developments. *Neuroscience and biobehavioral reviews* 48:92-147.
- 968 Kesner RP, Kirk RA, Yu Z, Polansky C, Musso ND (2016) Dentate gyrus supports slope recognition memory,  
969 shades of grey-context pattern separation and recognition memory, and CA3 supports pattern completion  
970 for object memory. *Neurobiology of learning and memory* 129:29-37.
- 971 Knierim JJ, Neunuebel JP (2016) Tracking the flow of hippocampal computation: Pattern separation, pattern  
972 completion, and attractor dynamics. *Neurobiology of learning and memory* 129:38-49.
- 973 Kobayashi M, Buckmaster PS (2003) Reduced inhibition of dentate granule cells in a model of temporal lobe  
974 epilepsy. *The Journal of neuroscience : the official journal of the Society for Neuroscience* 23:2440-2452.
- 975 Kron MM, Zhang H, Parent JM (2010) The developmental stage of dentate granule cells dictates their contribution  
976 to seizure-induced plasticity. *The Journal of neuroscience : the official journal of the Society for*  
977 *Neuroscience* 30:2051-2059.
- 978 Krook-Magnuson E, Armstrong C, Bui A, Lew S, Oijala M, Soltesz I (2015) In vivo evaluation of the dentate gate  
979 theory in epilepsy. *The Journal of physiology* 593:2379-2388.
- 980 Le Duigou C, Simonnet J, Telenczuk MT, Fricker D, Miles R (2014) Recurrent synapses and circuits in the CA3  
981 region of the hippocampus: an associative network. *Frontiers in cellular neuroscience* 7:262.
- 982 Lee CT, Kao MH, Hou WH, Wei YT, Chen CL, Lien CC (2016) Causal Evidence for the Role of Specific  
983 GABAergic Interneuron Types in Entorhinal Recruitment of Dentate Granule Cells. *Scientific reports*  
984 6:36885.
- 985 Lenck-Santini PP, Scott RC (2015) Mechanisms Responsible for Cognitive Impairment in Epilepsy. *Cold Spring*  
986 *Harbor perspectives in medicine* 5.
- 987 Levesque M, Avoli M (2013) The kainic acid model of temporal lobe epilepsy. *Neuroscience and biobehavioral*  
988 *reviews* 37:2887-2899.
- 989 Levesque M, Avoli M, Bernard C (2016) Animal models of temporal lobe epilepsy following systemic  
990 chemoconvulsant administration. *Journal of neuroscience methods* 260:45-52.
- 991 Lilliefors HW (1967) On the Kolmogorov-Smirnov test for normality with mean and variance unknown. *Journal of*  
992 *the American statistical Association* 62:399-402.
- 993 Liu KY, Gould RL, Coulson MC, Ward EV, Howard RJ (2016) Tests of pattern separation and pattern completion  
994 in humans-A systematic review. *Hippocampus* 26:705-717.
- 995 Lu Y, Zhong C, Wang L, Wei P, He W, Huang K, Zhang Y, Zhan Y, Feng G, Wang L (2016) Optogenetic  
996 dissection of ictal propagation in the hippocampal-entorhinal cortex structures. *Nature communications*  
997 7:10962.
- 998 Lynch M, Sayin U, Golarai G, Sutula T (2000) NMDA receptor-dependent plasticity of granule cell spiking in the  
999 dentate gyrus of normal and epileptic rats. *Journal of neurophysiology* 84:2868-2879.
- 1000 Madar AD, Ewell LA, Jones MV (2019a) Pattern separation of spiketrains in hippocampal neurons. *Scientific*  
1001 *reports* 9:5282.
- 1002 Madar AD, Ewell LA, Jones MV (2019b) Temporal pattern separation in hippocampal neurons through multiplexed  
1003 neural codes. *PLoS computational biology* 15:e1006932.

- 1004 McHugh TJ, Jones MW, Quinn JJ, Balthasar N, Coppari R, Elmquist JK, Lowell BB, Fanselow MS, Wilson MA,  
1005 Tonegawa S (2007) Dentate gyrus NMDA receptors mediate rapid pattern separation in the hippocampal  
1006 network. *Science* 317:94-99.
- 1007 Mongiat LA, Esposito MS, Lombardi G, Schinder AF (2009) Reliable activation of immature neurons in the adult  
1008 hippocampus. *PloS one* 4:e5320.
- 1009 Motulsky HJ, Ransnas LA (1987) Fitting curves to data using nonlinear regression: a practical and nonmathematical  
1010 review. *FASEB journal : official publication of the Federation of American Societies for Experimental*  
1011 *Biology* 1:365-374.
- 1012 Muller CJ, Groticke I, Bankstahl M, Loscher W (2009) Behavioral and cognitive alterations, spontaneous seizures,  
1013 and neuropathology developing after a pilocarpine-induced status epilepticus in C57BL/6 mice.  
1014 *Experimental neurology* 219:284-297.
- 1015 O'Reilly RC, McClelland JL (1994) Hippocampal conjunctive encoding, storage, and recall: avoiding a trade-off.  
1016 *Hippocampus* 4:661-682.
- 1017 Ouedraogo DW, Lenck-Santini PP, Marti G, Robbe D, Crepel V, Epsztein J (2016) Abnormal UP/DOWN  
1018 Membrane Potential Dynamics Coupled with the Neocortical Slow Oscillation in Dentate Granule Cells  
1019 during the Latent Phase of Temporal Lobe Epilepsy. *eNeuro* 3.
- 1020 Pardi MB, Ogando MB, Schinder AF, Marin-Burgin A (2015) Differential inhibition onto developing and mature  
1021 granule cells generates high-frequency filters with variable gain. *eLife* 4:e08764.
- 1022 Patrylo PR, Schweitzer JS, Dudek FE (1999) Abnormal responses to perforant path stimulation in the dentate gyrus  
1023 of slices from rats with kainate-induced epilepsy and mossy fiber reorganization. *Epilepsy research* 36:31-  
1024 42.
- 1025 Pernía-Andrade Alejandro J, Jonas P (2014) Theta-Gamma-Modulated Synaptic Currents in Hippocampal Granule  
1026 Cells In Vivo Define a Mechanism for Network Oscillations. *Neuron* 81:140-152.
- 1027 Pfammatter JA, Bergstrom RA, Wallace EP, Maganti RK, Jones MV (2018) A predictive epilepsy index based on  
1028 probabilistic classification of interictal spike waveforms. *PloS one* 13:e0207158.
- 1029 Racine RJ (1972) Modification of seizure activity by electrical stimulation: II. Motor seizure.  
1030 *Electroencephalography and clinical neurophysiology* 32:281-294.
- 1031 Ramirez S, Liu X, Lin PA, Suh J, Pignatelli M, Redondo RL, Ryan TJ, Tonegawa S (2013) Creating a false memory  
1032 in the hippocampus. *Science* 341:387-391.
- 1033 Rayner G, Tailby C, Jackson G, Wilson S (2019) Looking beyond lesions for causes of neuropsychological  
1034 impairment in epilepsy. *Neurology* 92:e680-e689.
- 1035 Reyes A, Holden HM, Chang YA, Uttarwar VS, Sheppard DP, DeFord NE, DeJesus SY, Kansal L, Gilbert PE,  
1036 McDonald CR (2018) Impaired spatial pattern separation performance in temporal lobe epilepsy is  
1037 associated with visuospatial memory deficits and hippocampal volume loss. *Neuropsychologia* 111:209-  
1038 215.
- 1039 Rolls ET (2010) A computational theory of episodic memory formation in the hippocampus. *Behavioural brain*  
1040 *research* 215:180-196.
- 1041 Santoro A (2013) Reassessing pattern separation in the dentate gyrus. *Frontiers in behavioral neuroscience* 7:96.
- 1042 Scimemi A, Schorge S, Kullmann DM, Walker MC (2006) Epileptogenesis is associated with enhanced  
1043 glutamatergic transmission in the perforant path. *Journal of neurophysiology* 95:1213-1220.
- 1044 Severa W, Parekh O, James CD, Aimone JB (2016) A Combinatorial Model for Dentate Gyrus Sparse Coding.  
1045 *Neural computation*:1-24.
- 1046 Sharma S, Puttachary S, Thippeswamy A, Kanthasamy AG, Thippeswamy T (2018) Status epilepticus: Behavioral  
1047 and electroencephalography Seizure Correlates in Kainate experimental Models. *Frontiers in neurology* 9:7.
- 1048 Simon P, Dupuis R, Costentin J (1994) Thigmotaxis as an index of anxiety in mice. Influence of dopaminergic  
1049 transmissions. *Behavioural brain research* 61:59-64.
- 1050 Sloviter RS (1983) "Epileptic" brain damage in rats induced by sustained electrical stimulation of the perforant path.  
1051 I. Acute electrophysiological and light microscopic studies. *Brain research bulletin* 10:675-697.
- 1052 Stark SM, Kirwan CB, Stark CEL (2019) Mnemonic Similarity Task: A Tool for Assessing Hippocampal Integrity.  
1053 *Trends in cognitive sciences*.
- 1054 Stark SM, Yassa MA, Lacy JW, Stark CE (2013) A task to assess behavioral pattern separation (BPS) in humans:  
1055 Data from healthy aging and mild cognitive impairment. *Neuropsychologia* 51:2442-2449.
- 1056 Tellez-Zenteno JF, Hernandez-Ronquillo L (2012) A review of the epidemiology of temporal lobe epilepsy.  
1057 *Epilepsy research and treatment* 2012:630853.

- 1058 Toyoda I, Bower MR, Leyva F, Buckmaster PS (2013) Early activation of ventral hippocampus and subiculum  
1059 during spontaneous seizures in a rat model of temporal lobe epilepsy. *The Journal of neuroscience : the*  
1060 *official journal of the Society for Neuroscience* 33:11100-11115.
- 1061 Treves A, Tashiro A, Witter MP, Moser EI (2008) What is the mammalian dentate gyrus good for? *Neuroscience*  
1062 154:1155-1172.
- 1063 van Hagen BT, van Goethem NP, Lagatta DC, Prickaerts J (2015) The object pattern separation (OPS) task: a  
1064 behavioral paradigm derived from the object recognition task. *Behavioural brain research* 285:44-52.
- 1065 Wallace E, Kim DY, Kim KM, Chen S, Blair Braden B, Williams J, Jasso K, Garcia A, Rho JM, Bimonte-Nelson H,  
1066 Maganti R (2015) Differential effects of duration of sleep fragmentation on spatial learning and synaptic  
1067 plasticity in pubertal mice. *Brain research* 1615:116-128.
- 1068 Witt JA, Helmstaedter C (2015) Cognition in the early stages of adult epilepsy. *Seizure* 26:65-68.
- 1069 Yassa MA, Mattfeld AT, Stark SM, Stark CE (2011) Age-related memory deficits linked to circuit-specific  
1070 disruptions in the hippocampus. *Proceedings of the National Academy of Sciences of the United States of*  
1071 *America* 108:8873-8878.
- 1072 Yi F, Catudio-Garrett E, Gabriel R, Wilhelm M, Erdelyi F, Szabo G, Deisseroth K, Lawrence J (2015) Hippocampal  
1073 "cholinergic interneurons" visualized with the choline acetyltransferase promoter: anatomical distribution,  
1074 intrinsic membrane properties, neurochemical characteristics, and capacity for cholinergic modulation.  
1075 *Frontiers in synaptic neuroscience* 7:4.
- 1076 Yim MY, Hanuschkin A, Wolfart J (2014) Intrinsic rescaling of granule cells restores pattern separation ability of a  
1077 dentate gyrus network model during epileptic hyperexcitability. *Hippocampus*.
- 1078 Zhang W, Huguenard JR, Buckmaster PS (2012) Increased excitatory synaptic input to granule cells from hilar and  
1079 CA3 regions in a rat model of temporal lobe epilepsy. *The Journal of neuroscience : the official journal of*  
1080 *the Society for Neuroscience* 32:1183-1196.
- 1081 Zhao F, Kang H, You L, Rastogi P, Venkatesh D, Chandra M (2014) Neuropsychological deficits in temporal lobe  
1082 epilepsy: A comprehensive review. *Annals of Indian Academy of Neurology* 17:374-382.
- 1083
- 1084
- 1085
